1 **Structural basis for transcription complex disruption by the Mfd**  
2 **translocase**

3

4 **Jin Young Kang<sup>1,3,4</sup>, Eliza Llewellyn<sup>1,3</sup>, James Chen<sup>1</sup>, Paul Dominic B. Olinares<sup>2</sup>,**  
5 **Joshua Brewer<sup>1</sup>, Brian T. Chait<sup>2</sup>, Elizabeth A. Campbell<sup>1</sup>, Seth A. Darst<sup>1,5,6</sup>**

6

7 <sup>1</sup>Laboratory of Molecular Biophysics, The Rockefeller University, New York, NY 10065,  
8 USA.

9 <sup>2</sup>Laboratory of Mass Spectrometry and Gaseous Ion Chemistry, The Rockefeller  
10 University, New York, NY 10065, USA.

11 <sup>3</sup>Contributed equally

12 <sup>4</sup>Present address: Department of Chemistry KAIST, 291 Daehak-ro, Yuseong-gu,  
13 Daejeon 34141, Republic of Korea

14 <sup>5</sup>Lead contact: [darst@rockefeller.edu](mailto:darst@rockefeller.edu)

15 <sup>6</sup>Correspondence to: [darst@rockefeller.edu](mailto:darst@rockefeller.edu)

16

17

18

19

20 **Summary**

21 **Transcription-coupled repair (TCR) is a sub-pathway of nucleotide excision repair**  
22 **(NER) that preferentially removes lesions from the template-strand (t-strand) that**  
23 **stall RNA polymerase (RNAP) elongation complexes (EC). Mfd mediates TCR in**  
24 **bacteria by removing the stalled RNAP concealing the lesion and recruiting**  
25 **Uvr(A)BC. We used cryo-electron microscopy to visualize Mfd engaging with a**  
26 **stalled EC and attempting to dislodge the RNAP. We visualized seven distinct**  
27 **Mfd-EC complexes in both ATP and ADP-bound states. The structures explain**  
28 **how Mfd is remodeled from its repressed conformation, how the UvrA-interacting**  
29 **surface of Mfd is hidden during most of the remodeling process to prevent**  
30 **premature engagement with the NER pathway, how Mfd alters the RNAP**  
31 **conformation to facilitate disassembly, and how Mfd forms a processive**  
32 **translocation complex after dislodging the RNAP. Our results reveal an elaborate**  
33 **mechanism for how Mfd kinetically discriminates paused from stalled ECs and**  
34 **disassembles stalled ECs to initiate TCR.**

35

36

37

38

## 39 INTRODUCTION

40

41 DNA template strand (t-strand) lesions that block elongation by RNA polymerase  
42 (RNAP), most notably UV-induced cyclobutane dimers (Bohr et al., 1985; Witkin, 1966),  
43 are targeted for preferential repair in a process called transcription-coupled repair [TCR;  
44 (Hanawalt and Spivak, 2008; Mellon and Hanawalt, 1989; Mellon et al., 1987). In TCR,  
45 the stalled elongating RNAP serves as an efficient detector of t-strand lesions that then  
46 becomes a privileged entry point into the nucleotide excision repair (NER) pathway  
47 through the action of a transcription repair coupling factor (TRCF). While putative  
48 TRCFs have been identified in archaea and eukaryotes (Troelstra et al., 1992; Walker  
49 et al., 2017; Xu et al., 2017), the bacterial superfamily 2 (SF2) Mfd translocase (Smith et  
50 al., 2007) has been shown *in vitro* and *in vivo* to be a bacterial TRCF (Kunala and  
51 Brash, 1992; Oller et al., 1992; Selby and Sancar, 1991, 1993; Selby et al., 1991).

52 *Escherichia coli* (*Eco*) Mfd (mutation frequency decline - named for its activity to  
53 reduce the frequency of suppressor mutations that occur when protein synthesis is  
54 inhibited subsequent to mutagenic treatment) was discovered through genetic analysis  
55 (Bockrath et al., 1987; Witkin, 1966), then identified as a TRCF, purified, and  
56 biochemically characterized (Selby and Sancar, 1993, 1994, 1995a, 1995b). These  
57 experiments showed that Mfd was necessary and sufficient for TCR *in vivo* and *in vitro*  
58 and that it expressed two major activities:

59 1) Relief of inhibition of NER by recognition and ATP-dependent removal of the stalled  
60 RNAP elongation complex (EC) otherwise concealing the damaged DNA (Brueckner et  
61 al., 2007; Selby and Sancar, 1990).

62 2) After RNAP displacement, stimulation of the rate of DNA repair by direct recruitment  
63 of the Uvr(A)BC endonuclease to the lesion (Deaconescu et al., 2012; Selby and  
64 Sancar, 1990, 1991, 1993).

65 Subsequent biochemical, biophysical, and structural analyses have painted a  
66 more detailed outline of the Mfd functional cycle as a TRCF:

67 1) Mfd engages with stalled or paused ECs (the specific means of EC stalling isn't  
68 important) through two interactions: i) Mfd binds to the RNAP  $\beta$  subunit via its RNAP-  
69 Interacting Domain [RID; (Deaconescu et al., 2006; Park et al., 2002; Selby and Sancar,  
70 1995b; Smith and Savery, 2005; Westblade et al., 2010), and ii) Mfd binds to duplex  
71 DNA upstream of the EC in an ATP-dependent manner via its RecG-like SF2  
72 translocase domains (Chambers, 2003; Deaconescu et al., 2006; Gorbalenya et al.,  
73 1989; Mahdi et al., 2003; Selby and Sancar, 1995b).

74 2) The Mfd SF2 ATPase translocates on the upstream duplex DNA, pushing the RNAP  
75 in the downstream direction (same direction as transcription) via multiple cycles of ATP  
76 hydrolysis (Howan et al., 2012; Park et al., 2002). Backtracked and arrested ECs  
77 (Komissarova and Kashlev, 1997a, 1997b) can thus be rescued into productive  
78 elongation (Park et al., 2002). However, if a t-strand lesion or other type of roadblock  
79 prevents RNAP forward translocation, the continued translocase activity of Mfd  
80 overwinds the upstream region of the transcription bubble, facilitating displacement of  
81 the RNA transcript, transcription bubble reannealing, and removal of the RNAP from the  
82 DNA (Chambers, 2003; Deaconescu et al., 2012; Howan et al., 2012; Manelyte et al.,  
83 2010; Murphy et al., 2009; Park and Roberts, 2006; Park et al., 2002; Proshkin and  
84 Mironov, 2016; Selby and Sancar, 1995a; Smith and Savery, 2005; Smith et al., 2007).

85 3) After disruption of the EC, Mfd remains on the DNA and continues to slowly  
86 translocate in the downstream direction in a highly processive manner over thousands  
87 of base pairs, carrying the RNAP along for the ride (Graves et al., 2015; Haines et al.,  
88 2014; Howan et al., 2012).

89 4) The processively translocating Mfd-RNAP complex disassembles when it interacts  
90 with UvrA<sub>2</sub>B, leaving behind the UvrA<sub>2</sub>B complex to recruit UvrC and complete the NER  
91 pathway (Fan et al., 2016; Selby, 2017).

92 Most of the biochemical activities of Mfd, such as ATPase activity, DNA binding  
93 and translocation, and interaction with UvrA, are strongly repressed in free Mfd (apo-  
94 Mfd) (Manelyte et al., 2010; Murphy et al., 2009; Smith et al., 2007). The apo-Mfd X-ray  
95 crystal structure revealed a protein with six structural modules connected by flexible  
96 linkers but held in a compact, inactive conformation (Deaconescu et al., 2006). Mfd  
97 activities are 'unleashed' by engagement with the EC, which is expected to be  
98 accompanied by profound conformational changes in Mfd (Srivastava and Darst, 2011).

99 Here, we used single particle cryo-electron microscopy (cryo-EM) to visualize  
100 how Mfd engages and displaces a stalled EC. We observe Mfd undergoing its ATP  
101 hydrolysis cycle attempting to release the RNA transcript and dislodge the RNAP from  
102 the DNA template. The ECs were stalled by nucleotide deprivation on a DNA scaffold  
103 containing a non-complementary transcription bubble that cannot rewind. Thus, despite  
104 engaging in cycles of ATP hydrolysis, Mfd was unable to efficiently dislodge the RNAP  
105 from the nucleic acids, facilitating the visualization of intermediates.

106 Using image classification approaches, we visualized seven distinct Mfd-EC  
107 complexes, some with ATP and others with ADP. Features of the structures allow their

108 placement in a pathway that provides a structural basis for understanding the extensive  
109 remodeling of Mfd upon its engagement with the EC and displacement of the RNAP.  
110 The structures explain how Mfd is remodeled from the repressed conformation  
111 (Deaconescu et al., 2006), how the UvrA-interacting surface of Mfd is hidden during  
112 most of the remodeling process to prevent premature engagement with the NER  
113 pathway, and how Mfd ultimately forms the processive translocation complex after  
114 dislodging the RNAP (Graves et al., 2015). Our results reveal the elaborate mechanism  
115 for how the Mfd translocase disassembles an otherwise stable EC and provide insight  
116 into the molecular motions that initiate TCR.

117

## 118 **RESULTS**

119

### 120 **Mfd with ATP forms a stable complex with an RNAP EC assembled on a non-** 121 **complementary transcription bubble**

122 We assembled *Eco* RNAP ECs on a nucleic acid scaffold (Komissarova et al., 2003)  
123 with the following features: i) a 20-mer RNA transcript designed to generate a post-  
124 translocated 9 base pair RNA/DNA hybrid with the DNA t-strand, ii) a mostly non-  
125 complementary transcription bubble to inhibit Mfd-mediated displacement of the RNAP  
126 (Park and Roberts, 2006), and iii) 40 base pairs of duplex DNA upstream of the  
127 transcription bubble to allow Mfd function (Park et al., 2002) (Figure 1A). Native  
128 electrophoretic mobility shift analysis (EMSA) showed a unique band containing protein  
129 and nucleic acid that appeared only in the presence of the pre-formed EC, Mfd, and

130 ATP (labeled '\*' in Figure 1B). Subsequent analysis of the contents of the \*-band by  
131 SDS-polyacrylamide gel electrophoresis showed that it contained both RNAP and Mfd  
132 (Figure 1C, lane 5). Stable ECs and Mfd-ECs with 1:1 stoichiometry were also detected  
133 by native mass spectrometry (nMS; Figure 1D).

134

### 135 **Seven structures in the Mfd activity cycle**

136 In the crystal structure of the 130 kDa *Eco* apo-Mfd (Deaconescu et al., 2006), domains  
137 D1a-D2-D1b form a structural unit with similarity to the namesake elements of UvrB that  
138 interact with UvrA (the 'UvrB homology module'; Figure 2A). Indeed, mutagenesis and  
139 structural studies establish that UvrB and Mfd share a common mode of UvrA  
140 recognition (Deaconescu et al., 2006, 2012; Manelyte et al., 2010; Pakotiprapha et al.,  
141 2009, 2012; Selby and Sancar, 1995b). D3 is a non-conserved, lineage-specific domain  
142 with unknown function. D4 (RNAP interacting domain, or RID) is necessary and  
143 sufficient for Mfd interaction with the RNAP  $\beta$ protrusion (Deaconescu et al., 2006; Park  
144 et al., 2002; Selby and Sancar, 1995b; Smith and Savery, 2005; Westblade et al.,  
145 2010). D5 and D6 comprise the RecG-like SF2 translocase domains (TD1/TD2). The  
146 interaction between the C-terminal D7 and the UvrA-interacting surface of D2 (Figure  
147 2A) maintains apo-Mfd in its repressed state (Deaconescu et al., 2006; Manelyte et al.,  
148 2010; Murphy et al., 2009; Smith et al., 2007).

149 To visualize the expected conformational changes in Mfd upon EC engagement  
150 and de-repression, we analysed the Mfd-EC complexes (Figure 1) by single particle  
151 cryo-EM. Steps of maximum-likelihood classification (Scheres, 2012) revealed seven  
152 Mfd-EC structures (L1, L2, C1-C5; Figure 2B-H) ranging from 3.4 to 4.1 Å nominal

153 resolution (Figures S1, S2, Table S1). With the exception of L1, the cryo-EM maps were  
154 of sufficient quality to directly observe the nucleotide status of each structure. C1, C2,  
155 and C5 contained either ATP or ADP•P (where the hydrolysed  $\gamma$ -phosphate has not  
156 been released); L2, C3 and C4 contained ADP (Figure 2C-H). Thus, Mfd was trapped  
157 progressing through its nucleotide hydrolysis cycle.

158 In all seven structures, the ECs have similar RNAP and nucleic acid  
159 conformations (root-mean-square-deviation for superimposed RNAP  $\alpha$ -carbons;  
160  $0.59 \text{ \AA} < \text{rmsd} < 3.64 \text{ \AA}$ ; Table S2A. See Methods for a description of the  
161 superimposition procedure. See Figure S3A-G for examples of cryo-EM density) and  
162 the Mfd-D4(RID) maintains its interactions with the RNAP  $\beta$ protrusion (Figure 2B-H)  
163 (Westblade et al., 2010). By contrast, the conformation of Mfd and the disposition of the  
164 upstream duplex DNA varies dramatically (Figure 2, Table S2B). As expected, all of the  
165 Mfd/DNA interactions occur through the DNA phosphate backbone.

166 In most of the structures, the cryo-EM density in the region around the upstream  
167 edge of the transcription bubble is poor and difficult to interpret, likely due to  
168 heterogeneity in that region. As a consequence, the precise register of the upstream  
169 duplex DNA in the models is tentative. However, gross features of the upstream DNA,  
170 such as the paths of the DNA backbone and of the overall helical axes, are clear  
171 (Figure S3A-G). In this regard, the engagement of Mfd significantly distorts the  
172 upstream duplex DNA. Mfd induces a localized kink in the DNA, roughly centered in the  
173 footprint of the Mfd translocation module [D5(TD1)/D6(TD2)] on the DNA. The Mfd  
174 translocation module engages with the duplex DNA from the minor groove; the kink,  
175 which ranges from  $7^\circ$ - $15^\circ$  away from Mfd, is accompanied by significant widening of the



176 DNA minor groove (Figure S3H). The entire length of the upstream duplex DNAs bends  
177 away from the Mfd translocation module by 16° to 45° (Figure S3A-G). Based on single  
178 molecule observations, the Mfd interaction with DNA was proposed to induce bending  
179 or wrapping of the DNA (Howan et al., 2012), consistent with these structural  
180 observations.

181

### 182 **One ATP hydrolysis cycle corresponds to translocation by one base pair**

183 Sequence analysis identifies Mfd as an SF2 ATPase (Gorbalenya and Koonin, 1993)  
184 with a RecA-type catalytic core that is most closely related to RecG (Chambers, 2003;  
185 Mahdi et al., 2003). Mfd and RecG are unique among SF2 ATPases in harboring a  
186 conserved 'TRG' (translocation in RecG) motif following the seven SF2 ATPase  
187 signature motifs. Mutations in conserved residues of the TRG motif uncouple ATP  
188 hydrolysis from duplex DNA translocation (Chambers, 2003; Mahdi et al., 2003). It has  
189 not been possible to understand the relationship between duplex DNA binding, the  
190 nucleotide status of the RecA catalytic core, and duplex DNA translocation mediated by  
191 the TRG motif due to the lack of structures of an SF2 translocase bound to duplex DNA  
192 in different nucleotide states. The series of Mfd-EC structures determined here help in  
193 this understanding.

194 The seven SF2 ATPase signature motifs cluster together at the interface  
195 between TD1 and TD2 where the nucleotide binds (Figure 3A). Since some of the  
196 structural states contain ATP (C1, C2, C5) while others contain ADP (L2, C3, C4;  
197 Figure 2B-H), we can compare the disposition of the translocation domains with respect  
198 to each other, and correlate with the nucleotide status.

199 We superimposed  $\alpha$ -carbons of residues 580-780 of TD1 (excluding the relay  
200 helix, which undergoes very large structural changes), yielding rmsds ranging between  
201 0.282 - 0.894 Å (Figure 3B). The TD1 superimposition yielded two discrete positions of  
202 TD2, one of which corresponded with the ATP-bound structures (C1, C2, C5; green in  
203 Figure 3B), and the other with the ADP-bound structures (L2, C3, C4; blue in  
204 Figure 3B). L1, the complex in which the resolution of the cryo-EM map in the region of  
205 the Mfd nucleotide binding site (Figure S2C) was insufficient to directly assign the  
206 nucleotide status, clearly groups with the ATP-bound structures (red in Figure 3B).  
207 Therefore, we infer that L1 contains Mfd(ATP).

208 In the ATP-containing structures, the carbonyl oxygen of G874 (motif V), and the  
209 side chains of R902 (motif VI) and R905 (just beyond motif VI), all in TD2, form polar  
210 interactions with the ATP  $\alpha$ -phosphate (Figure 3A, left). These three residues are  
211 absolutely conserved in an alignment of 65 Mfd sequences (Deaconescu et al., 2006).  
212 With the release of the  $\gamma$ -phosphate in the ADP structures, these interactions are lost  
213 and TD2 rotates away from TD1 [Figures 3A(right), 3B]. The movement of TD2 with  
214 respect to TD1 on transitioning from the ATP- to the ADP-bound state corresponds to  
215 an  $\sim 16^\circ$  rotation about an axis roughly perpendicular to the helical axis of the upstream  
216 duplex DNA (Figure 3B). As a result, the center of mass of TD2 shifts parallel to the  
217 DNA helical axis about 3.5 Å in the downstream direction (Figure 3B), corresponding to  
218 one base pair rise of B-form DNA. These observations are suggestive of an 'inchworm'  
219 model for translocation, as proposed for related SF1 helicase translocation on single-  
220 stranded nucleic acids (Lohman et al., 2008; Singleton et al., 2007; Velankar et al.,  
221 1999; Yarranton and Gefter, 1979) and for Mfd based on single-molecule observations

222 (Le et al., 2018). In this model (schematized in Figure 3C), upon hydrolysis and release  
223 of the  $\gamma$ -phosphate, TD2 moves forward on the duplex DNA and forms tight interactions  
224 one base pair downstream. Next, the TD1/DNA interactions loosen and ADP must  
225 exchange for ATP in the nucleotide-binding site. This allows TD1 to close towards TD2,  
226 reestablishing interactions with the ATP  $\gamma$ -phosphate, now with both TD1 and TD2  
227 translocated one base pair downstream on the duplex DNA (Figure 3C; Video S1). The  
228 model predicts a translocation stepsize of one nucleotide per ATP hydrolysis cycle,  
229 consistent with measurements for SF1 helicases (Dillingham et al., 2000; Tomko et al.,  
230 2007).

231         The TRG motif, which couples ATP hydrolysis to translocation, contains a helical  
232 hairpin motif followed by a meandering loop structure (Figure 3D). Each of these  
233 structural elements harbors one of the three conserved TRG residues that are critical for  
234 translocation: R929 (1st helix), R953 (2nd helix), and Q963 (loop) (Chambers, 2003;  
235 Mahdi et al., 2003). All three of these residues interact with the DNA phosphate  
236 backbone. The rotation axis of the TD2(ATP)  $\rightarrow$  TD2(ADP) transition passes directly  
237 through the linker connecting the helical hairpin (Figure 3D). Examining the structures  
238 more closely, the structural elements of TD2 C-terminal to the linker, which includes the  
239 second TRG hairpin-helix, the TRG loop, and the hook-helix, make extensive  
240 interactions with TD1 and move with TD1 as a rigid body, while the N-terminal portion of  
241 TD2 (residues 781-939) opens and closes depending on the nucleotide status. Thus,  
242 the linker connecting the TRG helical hairpin acts as the hinge (centered near  
243 absolutely conserved G942) for the TD1/TD2 conformational change in response to

244 nucleotide status. Opening of TD2 in the ADP state results in closing of the TRG helical-  
245 hairpin (Figure 3D).

246

### 247 **Pathway for Mfd function**

248 For the purpose of analyzing and discussing the structures, it is useful to place them in  
249 an ordered pathway. To begin the pathway, apo-Mfd from solution (Figure 2A) interacts  
250 with an EC. Comparing the Mfd component of each complex with the apo-Mfd structure  
251 (Deaconescu et al., 2006)], only L1(ATP) has an rmsd < 10 Å (all the others  
252 are >> 30 Å; Table S2B). Therefore we place L1(ATP) as the first structure in the  
253 pathway (Figure S4A).

254 To order the rest of the structures, we superimposed  $\alpha$ -carbons of each complete  
255 structure (Mfd and RNAP  $\alpha$ -carbons) with  $\alpha$ -carbons of every other structure and  
256 calculated the rmsd of  $\alpha$ -carbon positions, generating a table of 21 pair-wise rmsd  
257 values (Table S3A). L1(ATP) and L2(ADP) clearly stand apart from the other structures;  
258 L1 and L2 compared with every other structure exhibit rmsds between 19 Å to 47 Å,  
259 while C1-C5 compared with each other exhibit rmsds between 3.7 Å and 11.4 Å. We  
260 therefore propose that L1(ATP) and L2(ADP) are Mfd 'Loading' complexes, while  
261 C1(ATP), C2(ATP), C3(ADP), C4(ADP), and C5(ATP) are related structures looping in  
262 the Mfd nucleotide hydrolysis Cycle. Starting with L1(ATP), the path of transitions from  
263 one structure to the next that gives the smallest cumulative rmsd (Table S3A) is shown  
264 in Figure S4A.

265

266 **Mfd loading requires multiple rounds of ATP hydrolysis and is accompanied by**  
267 **profound conformational changes**

268 The Mfd component of L1(ATP) [Mfd(ATP)<sub>L1</sub>], the first experimental structure in the  
269 pathway (Figure S4A), is most similar to the structure of apo-Mfd [PDB 2EYQ;  
270 (Deaconescu et al., 2006)]. We modeled a presumed precursor to L1, [L0] (square  
271 brackets denote a structural model), by superimposing the apo-Mfd-D4(RID) structure  
272 onto the Mfd(ATP)<sub>L1</sub>-D4(RID) (Figure 4A). This reveals that the [L0] → L1 transition  
273 involves large translations and rotations of TD1 (11 Å translation, 43° rotation) and  
274 TD2 (16 Å translation, 37° rotation; Table S3B), bringing the two ATPase domains into  
275 alignment to bind ATP and engage with the DNA (Figures 4B, C).

276 Mfd requires ~30 base pairs of duplex DNA upstream of the EC transcription  
277 bubble [to about -40 (Park et al., 2002)]. Mfd/DNA interactions occur between about -34  
278 to -14 with one exception, Mfd(ATP)<sub>L1</sub> interacts with the DNA further upstream, from  
279 about -38 to -27 (Figures 4C, S4B), explaining the result of (Park et al., 2002) and also  
280 confirming that L1(ATP) is an obligate intermediate in the Mfd loading pathway.

281 In apo-Mfd, The D4(RID) is connected to the first RecA ATPase domain (TD1) by  
282 a 30-residue α-helix, the Relay Helix (RH, residues 548-577; Figure 4D). The RH at the  
283 N-terminus of TD1 interacts with the hook helices at the very C-terminus of TD2. In the  
284 [L0] → L1(ATP) transition, the translations and rotations of TD1 and TD2 result in  
285 unfolding of seven residues in the middle of the RH (561-567), and kinking of the RH  
286 ~112° around the second hook helix. The first hook helix also completely unfolds  
287 (Figure 4E).

288           The transition from L1(ATP) -> L2(ADP) involves remarkable rearrangements of  
289 the Mfd structural modules. Other than the D4(RID), which stays anchored to the RNAP  
290  $\beta$ protrusion, the minimum center-of-gravity translation of an Mfd structural module [D1-  
291 D3, D5(TD1), D6(TD2), D7] is 60 Å, while the minimum rotation is 148° (Figures 4F, 5;  
292 Table S3B). As a result of the large conformational rearrangement of Mfd, Mfd(ADP)<sub>L2</sub> is  
293 topologically 'wrapped' around the DNA (Figure 5), likely explaining how Mfd (with  
294 RNAP in tow) translocates processively over many kilobases of DNA (Fan et al., 2016;  
295 Graves et al., 2015).

296           Although it is difficult to imagine the choreography of the Mfd structural modules  
297 in the L1(ATP) -> L2(ADP) transition without parts of Mfd passing through itself or  
298 through the DNA, a pathway exists. First, D1-D3 must dissociate from its position in  
299 L1(ATP), generating a hypothetical intermediate [L1.5a] (Figure 5). The movement of  
300 D1-D3 could be triggered by initial rounds of ATP hydrolysis/translocation by the  
301 translocation module and is facilitated by the 25 amino acid linker connecting D3 with  
302 D4(RID) (Figures 2A, 5). The release of D1-D3 now opens a path for the Mfd  
303 translocation module to 'walk' along the DNA, corkscrewing in the downstream direction  
304 (clockwise in the view of Figure 5) until it bumps into the RNAP at its position in L2  
305 (Figures 4F, 5). As the Mfd translocation module corkscrews along the DNA, the N-  
306 terminal part of the RH (residues 548-560) completely unfolds and is dragged around  
307 the DNA, forming part of the topological link of Mfd on the DNA (Figure 4F).

308           In L1(ATP), the UvrA-interacting surface of D2 is occluded through its interaction  
309 with D7, as it is in apo-Mfd [Figures 4D, E; (Deaconescu et al., 2006, 2012)]. During the  
310 large rearrangements in the L1(ATP) -> L2(ADP) transition, D7 travels with the

311 translocation module, separating it from D2 (Figure 4F). However, in L2(ADP), the  
312 UvrA-interacting surface of D2 is still occluded by the DNA (Figure 4F).

313         The L2(ADP) -> C1(ATP) transition involves another large rearrangement of D1-  
314 D3 (45 Å translation, 102° rotation; Figure 5; Table S3B), which accommodates into its  
315 position seen in C1(ATP) -> C5(ATP). In this configuration, the UvrA-interacting surface  
316 of D2 is finally exposed to solution (Figure 5). The other Mfd structural modules make  
317 relatively small motions and Mfd remains topologically wrapped around the DNA  
318 (Figure 5).

319         The alternating nucleotide states on the transition from L1(ATP) -> L2(ADP) ->  
320 C1(ATP) indicate that the complete loading of Mfd involves rounds of ATP hydrolysis.  
321 Furthermore, since the translocation module traverses nine base pairs on the DNA in  
322 the L1(ATP) -> L2(ADP) transition, at least nine molecules of ATP must be hydrolysed  
323 (Figure S4A). Note this is before Mfd has entered the nucleotide hydrolysis cycle that  
324 serves to displace the RNAP (Figure S4A).

325         To test the structure-based hypothesis that ATP hydrolysis is required for Mfd  
326 loading to achieve a stable Mfd-EC complex, we incubated ECs and Mfd with vanadate  
327 ( $\text{VO}_4^{3-}$ ) and either ADP or ATP. With ADP in the nucleotide-binding site, vanadate can  
328 bind in the position normally occupied by the  $\gamma$ -phosphate; the ADP- $\text{VO}_4$  complex is  
329 thought to mimic the ATP hydrolysis transition state and is an effective inhibitor of ATP  
330 binding and hydrolysis (Davies and Hol, 2004). ADP and vanadate from solution bind  
331 directly in the nucleotide-binding site without any rounds of ATP hydrolysis since no  
332 ATP is present. With ATP and vanadate, on the other hand, at least one round of ATP  
333 hydrolysis can occur. Following ATP hydrolysis, vanadate substitutes for the leaving

334 inorganic phosphate before ADP can be released, inhibiting further ATP hydrolysis  
335 (Oldham and Chen, 2011; Shimizu and Johnson, 1983).

336 Recall that incubating Mfd and ATP with ECs formed on a nucleic acid scaffold  
337 containing a partially non-complementary transcription bubble gave rise to a unique  
338 complex observed by EMSA (Figures 1, 5B, band labeled "\*" in lane 1). ADP + vanadate  
339 does not support complex formation, while ATP + vanadate does (Figure 5B,  
340 lanes 2, 3). The same concentrations of ATP + vanadate completely inhibited Mfd  
341 function in an EC displacement assay (Chambers, 2003)(Figure S4C). These  
342 experiments establish that at least one round of ATP hydrolysis is required for Mfd to  
343 form a stable complex with an EC.

344

#### 345 **Mfd manipulates the RNAP conformation during its nucleotide hydrolysis cycle**

346 After the Mfd loading pathway results in the formation of C1(ATP), we propose that Mfd  
347 then loops through an ATP hydrolysis cycle, captured in the five distinct structural states  
348 [C1(ATP)  $\leftrightarrow$  C2(ATP)  $\leftrightarrow$  C3(ADP)  $\leftrightarrow$  C4(ADP)  $\leftrightarrow$  C5(ATP)  $\leftrightarrow$  C1(ATP) ...;  
349 Figure 6]. Compared to the profound conformational changes that occur through the  
350 loading pathway (Figures 4, 5), the conformations of Mfd in C1 - C5 are similar to each  
351 other (Table S2B). Comparing the Mfd loading conformations of L1(ATP), L2(ADP), and  
352 C1(ATP) gives rmsd values ranging from 26.0 Å to 38.4 Å, while comparing C1(ATP)  
353 through C5(ATP) gives rmsd values ranging from 3.95 Å to 7.68 Å (Table S2B).  
354 Although the Mfd conformations in C1(ATP) through C5(ATP) are similar, Mfd as a  
355 whole, along with the upstream duplex DNA, wobbles back and forth with respect to the  
356 EC by more than 30° (Figure 6, Table S3B).



357           During its nucleotide hydrolysis cycle (C1-C2-C3-C4-C5-C1...), Mfd translocates  
358 on the upstream duplex DNA in the downstream direction, tracking in the minor groove  
359 (Figure 3, Video S1). If the RNAP is unable to translocate forward, this results in  
360 overwinding of the upstream DNA, facilitating collapse of the transcription bubble and  
361 release of the RNA transcript (Park and Roberts, 2006). However, the motions of Mfd  
362 during the nucleotide hydrolysis cycle also induce significant conformational changes to  
363 the RNAP itself: clamp opening and  $\beta$ lobe-Si1 rotation (Figure 6).

364           The conformation of RNAP in C1(ATP) is very similar to the conformation of  
365 RNAP in an EC (Kang et al., 2017). Using C1(ATP) as a reference conformation for  
366 RNAP (clamp opening =  $\beta$ lobe-Si1 rotation =  $0^\circ$ ), the conformational changes of Mfd  
367 during its nucleotide hydrolysis cycle cause opening and closing of the clamp, with the  
368 peak of clamp opening,  $17.3^\circ$ , at C3(ADP) (Figure 6). Similar magnitudes of clamp  
369 opening have been observed in many structures, without (Zhang et al., 1999) and with  
370 nucleic acids (Tagami et al., 2010; Weixlbaumer et al., 2013).

371           The Mfd conformational changes through the nucleotide hydrolysis cycle also  
372 cause a sideways rotation of the  $\beta$ lobe-Si1 module, with the peak of  $\beta$ lobe-Si1 rotation,  
373  $14.3^\circ$ , at C5(ATP) (Figure 6). The direction and magnitude of the  $\beta$ lobe-Si1 rotation are  
374 very similar to an RNAP conformational change induced by TraR binding (Chen et al.,  
375 2019a). In the case of TraR, this conformational change occurs in the context of an  
376 initiation complex with promoter DNA and has multiple effects depending on the  
377 promoter context (Chen et al., 2019a, 2020). In the context of an EC, we propose that  
378 the  $\beta$ lobe-Si1 rotation alters the RNAP-downstream DNA duplex contacts in the RNAP

379 cleft, destabilizing these interactions and thereby destabilizing the EC (Nudler et al.,  
380 1996). The conformational transitions during the Mfd-NHC are visualized in Video S2.

381

## 382 **DISCUSSION**

383

384 The crystal structure of apo-Mfd revealed a compact but complex arrangement of  
385 structural modules connected by long, flexible linkers [Figure 2A; (Deaconescu et al.,  
386 2006)]. Interdomain interactions maintain Mfd in a repressed state, where its activities of  
387 ATP hydrolysis, DNA translocation, and UvrA binding are suppressed (Manelyte et al.,  
388 2010; Murphy et al., 2009; Smith et al., 2007). Amino acid substitutions that disrupt key  
389 interdomain interactions cause profound conformational changes in Mfd and unleash its  
390 ATPase and DNA translocase activities (Manelyte et al., 2010; Murphy et al., 2009;  
391 Smith et al., 2007). In this work, we observed seven distinct structures (Figure 2B-H)  
392 that delineate how the initial interaction of Mfd with an EC triggers a stepwise series of  
393 dynamic conformational changes, culminating in the stable engagement of Mfd with the  
394 EC and then ATP-hydrolysis powered disruption of the EC. Key structural features and  
395 conformational changes are highlighted in the context of the transition path from one  
396 structure to the next (Figure S4A) in the summary Figure 7.

397 Initial binding of the Mfd-RID to the RNAP  $\beta$ protrusion to generate the  
398 hypothetical state [L0] (Figures 4A, 4B, 7) does not appear to require conformational  
399 changes as presumed, but rather tethers the Mfd translocation module in close  
400 proximity to the upstream duplex DNA of the EC (Figure 4B). The disposition of TD1  
401 and TD2 in [L0] is not conducive to DNA or ATP binding (Deaconescu et al., 2006), but

402 thermal breathing of the Mfd domains could transiently align TD1 and TD2 to allow ATP  
403 binding and stable engagement of the upstream duplex DNA in L1(ATP)  
404 (Figures 4C, 7). In L1(ATP), Mfd engages with the upstream duplex DNA to -38,  
405 explaining why Mfd requires upstream duplex DNA to about -40 to displace the EC  
406 (Park et al., 2002).

407         The alignment of TD1 and TD2 and ATP binding allows ATP hydrolysis in  
408 L1(ATP), which initiates inchworming of the Mfd translocation module in the  
409 downstream direction (Figure 3). We hypothesize that this induces the displacement of  
410 D1-D3 (which is still tethered), clearing a path for continued translocation of TD1/TD2  
411 (Figure 5A). TD1/TD2 walk along the duplex DNA (Figure 3), corkscrewing around the  
412 DNA for nine base pairs and in the process leave the unfolded relay-helix polypeptide  
413 wrapped around the DNA in L2(ADP) (Figures 4F, 5A). This ATP-hydrolysis-driven  
414 choreography results in Mfd completely encircling the upstream duplex DNA, explaining  
415 the remarkable processivity of the translocating Mfd-RNAP complex subsequent to EC  
416 disruption (Fan et al., 2016; Graves et al., 2015).

417         After walking freely in the downstream direction for nine base pairs, the Mfd  
418 translocation module butts up against the RNAP (Figure 4F). The D1-D3 module  
419 accommodates itself to the new molecular environment it finds itself in, finally exposing  
420 the previously occluded UvrA-binding determinant (Figure 5A, 7).

421         At this point, if the RNAP is backtracked (Komissarova and Kashlev, 1997a,  
422 1997b; Nudler et al., 1997), continued Mfd translocation in turn forward translocates the  
423 RNAP until the active configuration of the EC, with the RNA transcript 3'-end in the  
424 RNAP active site, is reached (Park et al., 2002). In the presence of NTP substrates,

425 RNA chain elongation by the RNAP can resume and the RNAP, which translocates at  
426 ~15-20 nucleotides/s, runs away from Mfd, which translocates at only ~4 nucleotides/s  
427 (Howan et al., 2012; Le et al., 2018).

428 If RNAP forward translocation is blocked, either by the absence of NTP  
429 substrates, a bulky lesion in the t-strand DNA (such as a CPD dimer), or a roadblock  
430 such as a DNA binding protein, continued translocation by the Mfd translocation module  
431 will essentially pull and torque the DNA out the back of the RNAP. The torquing action  
432 of Mfd positively supercoils the DNA between the Mfd translocation module and the tight  
433 grip of the RNAP on the downstream duplex DNA, causing the nt-strand DNA of the  
434 transcription bubble to reanneal with the t-strand DNA, displacing the RNA transcript  
435 (Park and Roberts, 2006). The stability of the EC is dependent on the RNA/DNA hybrid  
436 (Kireeva et al., 2000), so release of the RNA transcript results in release of the RNAP  
437 from the DNA template.

438 The particles that gave rise to all seven of the Mfd-EC structures came from two  
439 separate samples that were prepared in the same way (Figure S1), so the relative  
440 numbers of particles that belong to each structural class are related to the relative  
441 stability of that class - the more particles in a structural class, the more stable that  
442 structure is. The first structure in our pathway [L1(ATP)] is also the least stable  
443 (Figure S4A), indicating that this first step of engagement of Mfd with the DNA is  
444 reversible and that L1(ATP) is likely in a dynamic equilibrium with [L0] and/or Mfd in  
445 solution. The single molecule analysis of (Howan et al., 2012) found that engagement of  
446 Mfd with a stalled EC was characterized by weak initial binding of Mfd (Mfd molecules

447 attempt binding to the stalled EC many times before engaging productively), consistent  
448 with our findings.

449 The initial weak binding of Mfd to the stalled EC was followed by a very slow  
450 catalytic step ( $k = 0.059 \text{ s}^{-1}$ ) that required multiple rounds of ATP hydrolysis (Howan et  
451 al., 2012). The L1(ATP)  $\rightarrow$  L2(ADP) transition requires 9 rounds of ATP hydrolysis. The  
452 reversible equilibrium at the first step, and the presumably slow, multi-step transition  
453 required to ultimately reach the NHC, are consistent with proposals that Mfd kinetically  
454 discriminates a stalled EC (which Mfd is charged with displacing) and an EC that is  
455 simply paused (Kang et al., 2019; Landick, 2006) and should not be displaced. The  
456 slow, reversible loading pathway ensures that only the very long-lived stalled EC  
457 becomes a target for Mfd displacement and recruitment of UvrA. The kinetic  
458 discrimination of stalled vs. paused (but still productive) ECs explains why  
459 overexpression of Mfd is not toxic to cells (Deaconescu et al., 2006; Roberts and Park,  
460 2004; Selby and Sancar, 1993; Smith et al., 2012).

461 Based on the populations of the states (Figure S4A), the NHC states (C1-C5) are  
462 considerably more stable than the loading states (L1-L2), indicating that once the  
463 complex passes through the loading pathway and enters the NHC, it is essentially  
464 irreversibly trapped, where it attempts to translocate on the DNA against the immovable  
465 EC, imparting positive torque on the DNA and ultimately collapsing the transcription  
466 bubble, releasing the RNA transcript, and displacing the RNAP from the DNA. During  
467 this process, Mfd manhandles the RNAP, prying open the RNAP clamp and  $\beta$ lobe-Si1  
468 to cause RNAP to lose its grip on the nucleic acids (Figure 6).

469 Thus, entry into the NHC is essentially like a molecular switch. In the reversible,  
470 slow loading pathway, Mfd probes the lifetime of the stalled/paused EC. During these  
471 stages, the Mfd UvrA-binding determinant is occluded; premature recruitment of UvrA  
472 would disrupt the Mfd-EC complex, short circuiting the TCR pathway. It could also  
473 counterproductively recruit NER components to sites on the genome that are not  
474 damaged. The elaborate conformational choreography of Mfd loading and EC  
475 displacement is thus evolutionarily tuned to prevent disruption of normal regulation of  
476 transcription elongation but to engage the NER pathway when a lesion is likely  
477 encountered.

478

479 **Acknowledgments** We thank M. Oldham and A.J. Smith for assistance and advice with  
480 experimental procedures, M. Ebrahim and J. Sotiris at The Rockefeller University  
481 Evelyn Gruss Lipper Cryo-electron Microscopy Resource Center for help with cryo-EM  
482 data collection, and N. Savery, T. Strick, and members of the Darst/Campbell laboratory  
483 for helpful discussion on the manuscript. This work was supported by NIH grants  
484 P41 GM109824 and P41 GM103314 to B.T.C., R01 GM114450 to E.A.C., and  
485 R35 GM118130 to S.A.D.

486

487 **Author contributions** J.Y.K., E.L. and J.B. expressed and purified proteins and  
488 performed biochemical assays. J.Y.K., E.L., P.D.B.O., and B.T.C. performed native  
489 mass spectrometry analyses. J.Y.K. and E.L. prepared cryo-EM grids and collected  
490 cryo-EM data. J.Y.K., E.L., and J.C. processed cryo-EM data. S.A.D. built, refined, and

491 validated models. B.T.C., E.A.C., and S.A.D. supervised the project. All authors  
492 prepared and revised the manuscript.

493

494 **Competing interests** The authors declare there are no competing interests.

495

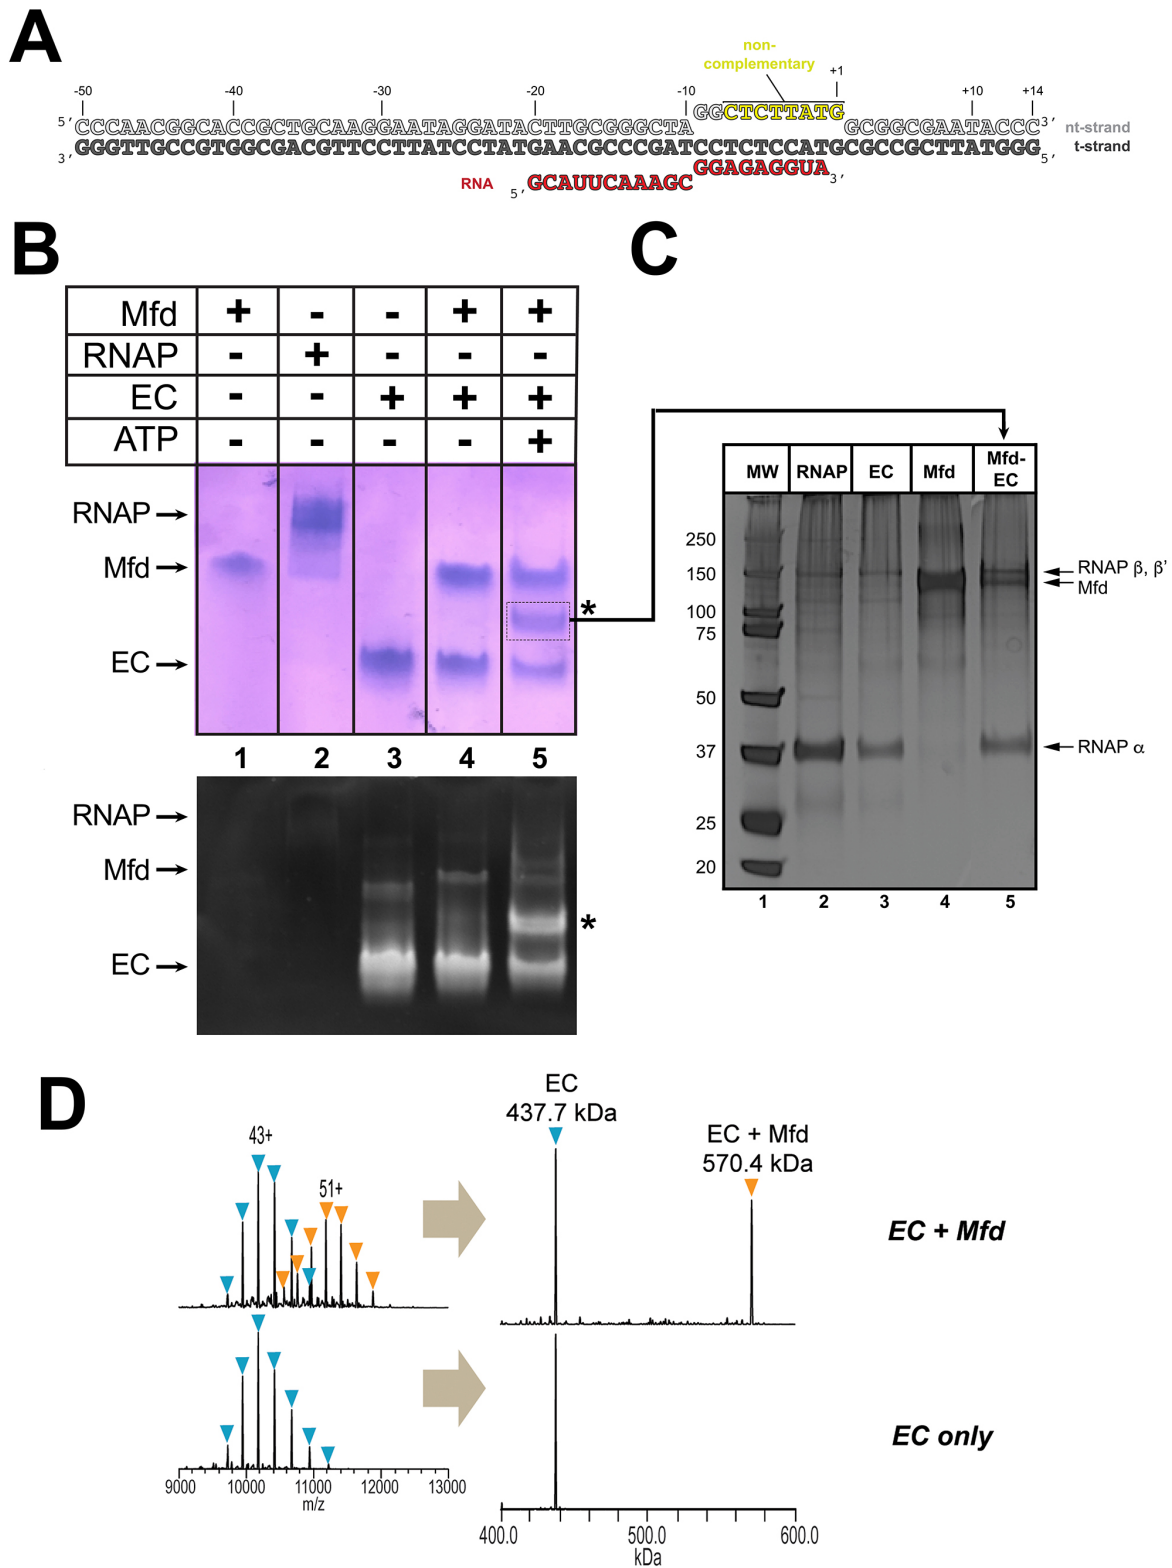

Kang et al, Figure 1



497 **Figure 1. Formation of stable complexes between Mfd and an RNAP elongation**  
498 **complex.**

499 A. The nucleic acid scaffold used for native mass spectrometry (nMS) and cryo-EM. The  
500 region of the nt-strand DNA shown in yellow is non-complementary with the t-strand.

501 B. Native gel electrophoretic mobility shift assay reveals the formation of a unique  
502 complex in the presence of an *Eco* RNAP EC (formed on the nucleic acid scaffold  
503 shown in A), Mfd, and 2 mM ATP (band labeled '\*', lane 5). The same gel was stained  
504 with Coomassie blue to reveal protein (top panel) or Gel Red to reveal nucleic acids  
505 (bottom panel).

506 C. The band labeled '\*' (panel B, lane 5) was excised from the gel and analyzed by  
507 SDS-polyacrylamide gel electrophoresis with silver staining, revealing the presence of  
508 RNAP and Mfd (lane 5).

509 D. nMS spectra and the corresponding deconvolved spectra for EC and Mfd-EC  
510 samples with the nucleic acid scaffold shown in (A). RNAP forms a stable EC with 1:1  
511 stoichiometry (437.7 kDa complex). Upon incubation of this complex with sub-  
512 stoichiometric Mfd (Mfd:EC ratio of 1:2) and 2 mM ATP, about 40% of the EC was  
513 converted to the Mfd-EC complex (570.4 kDa) with 1:1 stoichiometry. Excess EC was  
514 mixed with Mfd because unbound Mfd yielded extremely high relative peak signals that  
515 dominated the spectrum, making interpretation and quantitation difficult.

516  
517

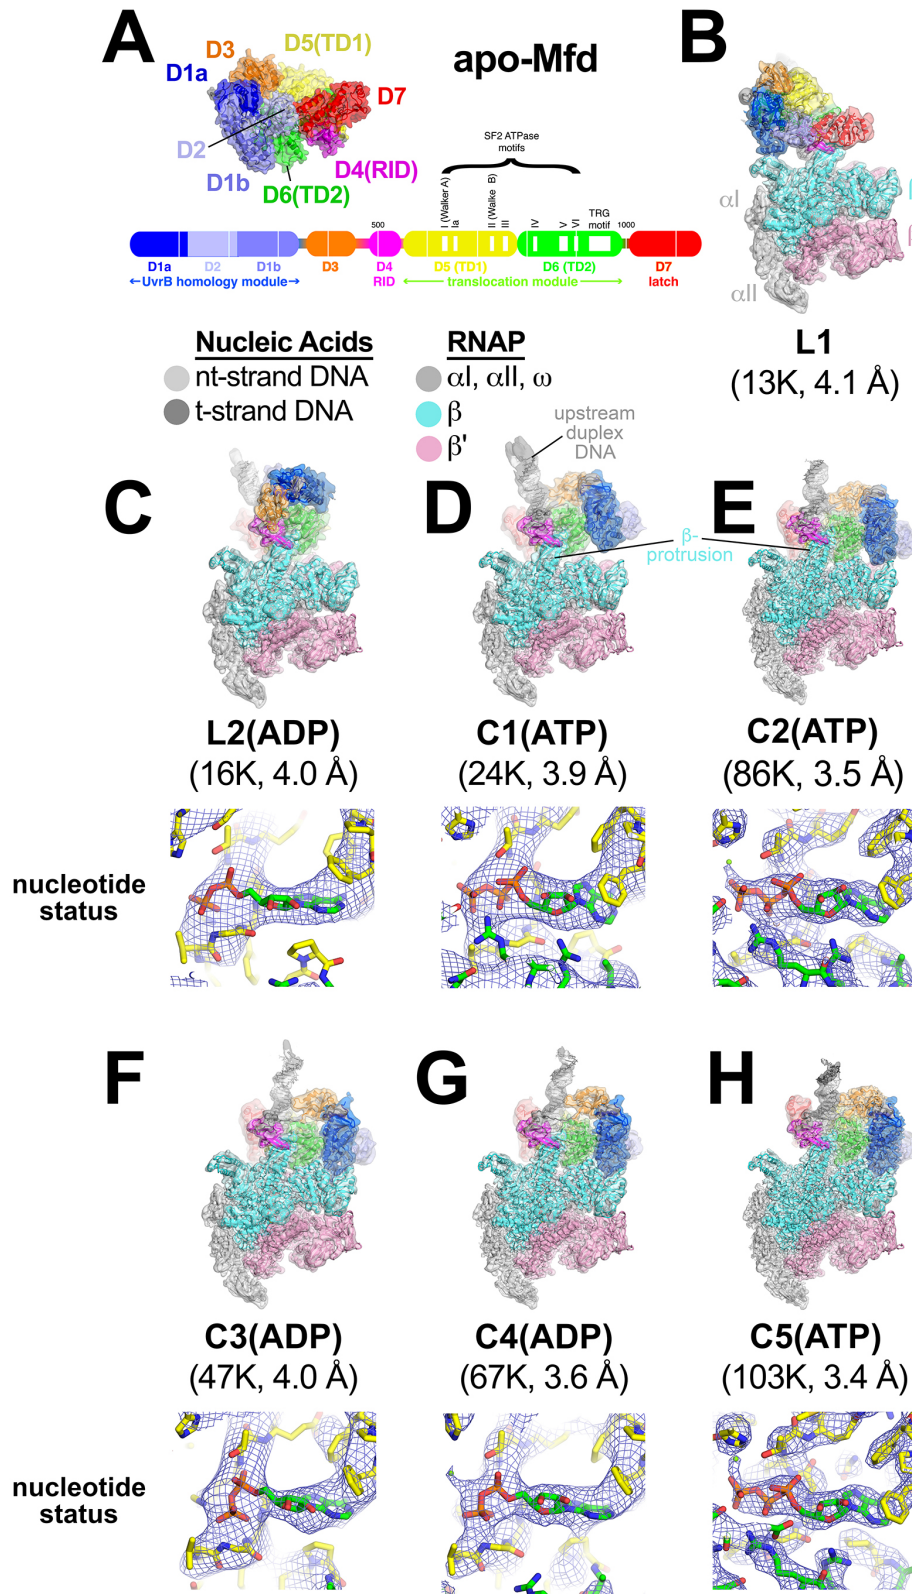

Kang et al., Figure 2

519 **Figure 2. Mfd-EC structures.**

520 A. The structure of apo-Mfd [PDB 2EYQ; (Deaconescu et al., 2006)] is shown as a  
521 transparent molecular surface surrounding a backbone ribbon. The domain  
522 nomenclature and color-coding are schematically represented by the horizontal bar  
523 below, which represents the 1148-residue *Eco* Mfd primary sequence (every  
524 100 residues are marked by a vertical white line). Structural domains are shown as thick  
525 bars, thin bars represent connecting linkers. The UvrB homology module (D1a-D2-D1b)  
526 is structurally homologous to the namesake elements of UvrB (Deaconescu et al., 2006;  
527 Selby and Sancar, 1993). D4 is the RNAP Interacting Domain (RID). D5  
528 (Translocation Domain 1, or TD1) and D6 (TD2) contain the seven SF2 ATPase motifs  
529 [denoted by white boxes and labeled (Gorbalenya and Koonin, 1993)] as well as the  
530 TRG motif (Chambers, 2003; Mahdi et al., 2003), and together comprise the translocation  
531 module.

532 B. - H. (*top*) Overall structures of Mfd-EC complexes obtained by cryo-EM. The cryo-EM  
533 density maps [low-pass filtered to the local resolution (Cardone et al., 2013) are shown  
534 as transparent surfaces with final models superimposed. Mfd is colored as shown in (A);  
535 the RNAP and nucleic acids are colored according to the key.

536 (*bottom*) Cryo-EM density (blue mesh) and superimposed models in the region around  
537 the Mfd nucleotide-binding site. Except for L1 (B), the maps were of sufficient quality to  
538 identify the nucleotide status, either ADP or ATP (or ATP•P).

539 B. L1.

540 C. L2(ADP).

541 D. C1(ATP).

542 E. C2(ATP).

543 F. C3(ADP).

544 G. C4(ADP).

545 H. C5(ATP).

546 See also Figures S1 - S3 and Table S1.

547

548

549

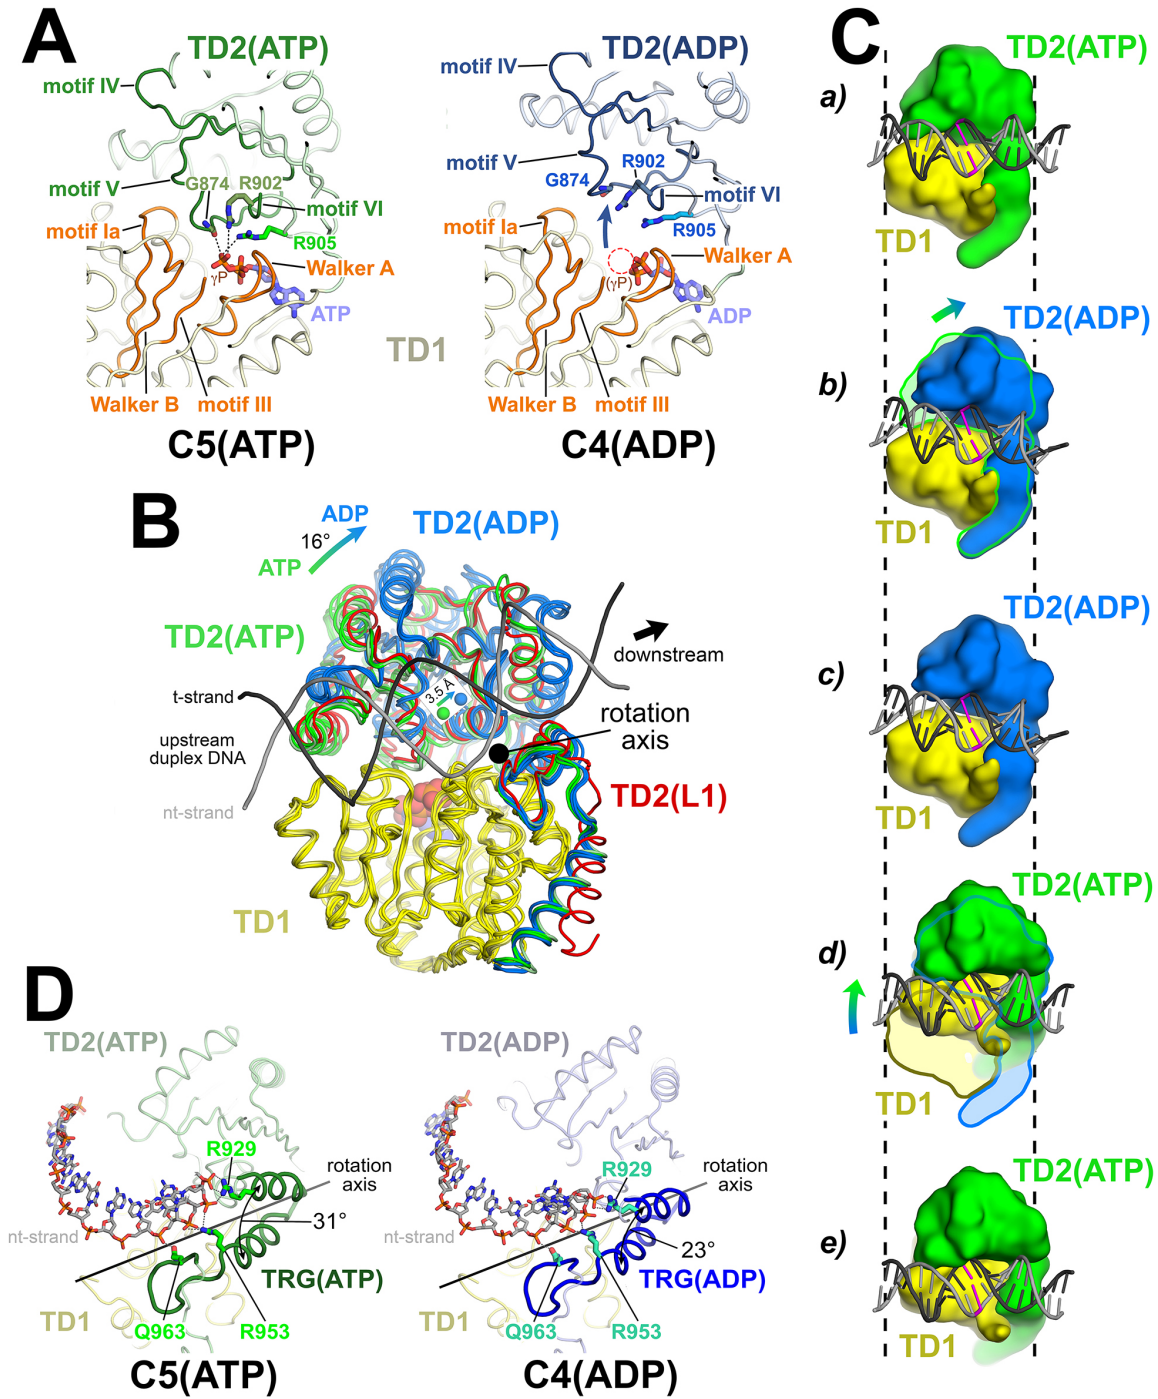

Kang et al., Figure 3

550  
 551

552 **Figure 3. The Mfd translocation module and the DNA translocation mechanism.**

553 A. Conformational changes of the Mfd translocation module induced by ATP hydrolysis  
554 and Pi release. The structural environments of the ATP [left; C5(ATP)] or ADP [right;  
555 C4(ADP)] binding sites are shown. The protein is shown as a backbone worm; TD1 is  
556 colored pale yellow but the SF2 ATPase motifs of TD1 (Walker A, motif Ia, Walker B,  
557 motif III) are colored orange; TD2(ATP) or (ADP) are colored pale green or light blue,  
558 respectively, but the SF2 ATPase motifs of TD2 (motifs IV, V, and VI) are colored dark  
559 green or dark blue. The nucleotide is shown in stick format with blue carbon atoms. The  
560 side chain or backbone atoms of three key residues, G874 (motif V), R902 (motif VI),  
561 and R905 (just beyond motif vi) are also shown. The backbone carbonyl of G874 and  
562 the side chains of R902 and R905 form polar interactions with the ATP  $\gamma$ -phosphate  
563 (denoted as gray dashed lines). In the ADP structure, these interactions are lost due to  
564 the missing  $\gamma$ -phosphate (denoted by the dashed red circle), causing TD2 to swing away  
565 from TD1 (denoted by the thick arrow).

566 B. The translocation modules of all seven Mfd-EC structures were superimposed by  
567 alignment of TD1 (colored yellow)  $\alpha$ -carbons. The resulting positions of TD2 clustered  
568 into two groups, those with ATP (TD2 colored green) or ADP (TD2 colored blue). TD2 of  
569 L1 is shown in red and clusters with the ATP-bound structures. The relative disposition  
570 of the upstream duplex DNA is also shown (gray phosphate backbone worms).

571 TD2(ATP) and TD2(ADP) are related by an  $\sim 16^\circ$  rotation (denoted by the thick arrow,  
572 upper left) about an axis roughly perpendicular to the DNA helical axis (denoted by the  
573 black dot), resulting in a 3.5 Å shift of the TD2 center of mass roughly parallel to the  
574 DNA helical axis [center of mass positions for TD2(ATP) and TD2(ADP) denoted by the

575 green and blue spheres, respectively], corresponding to one base pair rise of B-form  
576 DNA.

577 C. Inchworm model for duplex DNA translocation. Duplex DNA is shown as a cartoon  
578 (for reference, a central base pair is colored magenta). TD1 is colored yellow, while TD2  
579 is colored green (ATP) or blue (ADP). In *a*, both TD1 and TD2(ATP) interact with the  
580 duplex DNA (the initial positions of TD1 and TD2 on the DNA are denoted by the  
581 vertical dashed reference lines). Upon ATP hydrolysis and Pi release, TD2(ADP) rotates  
582 away from TD1 (*b*) and interacts with the DNA one base pair downstream (to the right,  
583 *c*). With the release of ADP, ATP binding induces TD1 to rotate towards TD2 (*d*). In *e*,  
584 TD1 and TD2(ATP) both interact with the duplex DNA but one base pair to the right.

585 D. Conformational changes of the TRG motif. Protein is shown as a backbone worm;  
586 TD1 is colored pale yellow; TD2(ATP) or (ADP) are colored pale green or light blue,  
587 respectively, but the TRG motifs are colored dark green or dark blue. The nt-strand of  
588 the upstream duplex DNA is shown in stick format (the t-strand of the DNA is not shown  
589 for clarity). Three key TRG motif residues interact with the nt-strand DNA backbone,  
590 R929, R953, and Q963 (side chains shown, polar interactions with the DNA denoted by  
591 the gray dashed lines). The rotation axis of the TD2(ATP) -> TD2(ADP) conformational  
592 change passes directly through the TRG motif helical hairpin linker, which serves as the  
593 hinge. Opening of TD2(ADP) causes the TRG helical hairpin to pinch closed nearly  
594 10 Å.

595

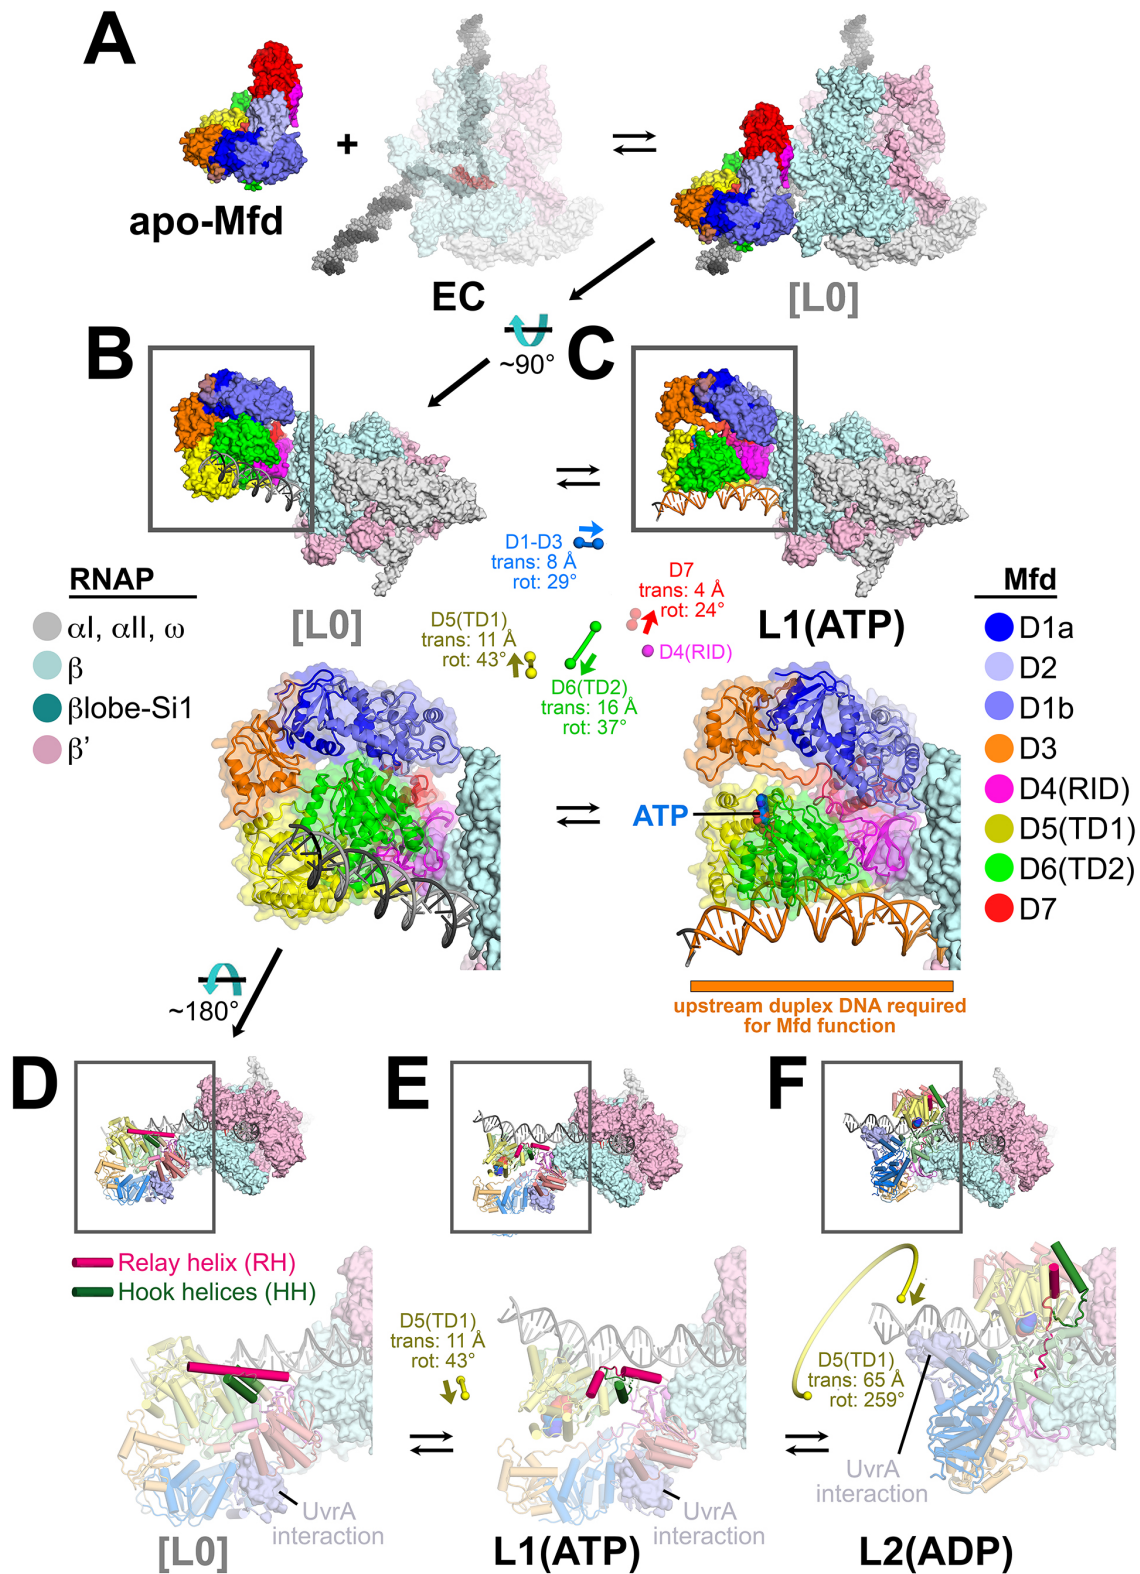

Kang et al., Figure 4



597 **Figure 4. Initial stages of the Mfd loading pathway.**

598 Color-coding of RNAP subunits and Mfd domains are shown in the keys on the left and  
599 right, respectively.

600 A. Apo-Mfd [PDB 2EYQ (Deaconescu et al., 2006) combines with an EC [PDB 6ALF  
601 (Kang et al., 2017) with upstream and downstream duplex DNA extended] to form a  
602 putative initial encounter complex [L0], which was modeled by superimposing apo-Mfd  
603 D4(RID) onto the Mfd<sub>L1</sub>-D4(RID) and adjusting the trajectory of the upstream duplex  
604 DNA.

605 B. - C. The [L0] → L1(ATP) transition is shown. In this view, the downstream duplex  
606 DNA (and the direction of transcription) points away from the viewer.

607 (*top*) The Mfd-EC structures are shown as molecular surfaces with DNA shown in  
608 cartoon format. The boxed regions are magnified below.

609 (*bottom*) Mfd is shown as a transparent molecular surface surrounding a backbone  
610 ribbon. In the middle, the colored spheres denote the relative positions of the Mfd  
611 domain center-of-masses (com), with connecting lines denoting the motions from the  
612 L[0] → L1(ATP) transition (the translations of the com's, as well as the relative rotation  
613 of the domains, are listed. The D4(RID) motion is negligible; also see Table S3B).

614 B. [L0].

615 C. L1(ATP): The region of the upstream duplex DNA colored orange and denoted by the  
616 orange stripe was found to be required for Mfd function on an EC (Park et al., 2002).

617 D. - F. View of the [L0] → L1(ATP) → L2(ADP) transition, highlighting the structural  
618 changes in the Mfd relay helix (RH) and hook helices (HH). In this view, the Mfd-EC

619 complex is rotated  $\sim 180^\circ$  about a horizontal axis, so the downstream duplex DNA (and  
620 direction of transcription) is towards the viewer.

621 (*top*) The RNAP is shown as a molecular surface, with nucleic acids shown in cartoon  
622 format. Mfd is shown with cylindrical helices. Color-coding is as above but the RH is  
623 colored hot pink, the HHs are colored dark green. The boxed region is magnified below.

624 (*bottom*) The complexes are shown in faded colors except for the RH and HHs. Also  
625 shown as a molecular surface are the residues of Mfd-D2 that interact with UvrA  
626 [determined from PDB 4DFC (Deaconescu et al., 2012)].

627 D. L[0]: The RH at the very N-terminus of TD1 extends for 30 residues and is  
628 surrounded by the HH's at the very C-terminus of TD2. The UvrA-interacting surface of  
629 Mfd-D2 is occluded by D7 (Deaconescu et al., 2006).

630 E. L1(ATP): The middle portion of the RH helix unfolds and the RH kinks about  $112^\circ$   
631 around the second HH due to the translation/rotation of TD1 (denoted) and also TD2.  
632 The UvrA-interacting surface of Mfd-D2 is still occluded by D7.

633 F. L2(ADP): The transition from L1(ATP)  $\rightarrow$  L2(ADP) involves a  $259^\circ$  rotation of TD1  
634 around the backside of the DNA, as well as a  $65 \text{ \AA}$  translation towards the RNAP  
635 (denoted). This is likely accomplished by ATP-hydrolysis-dependent walking of the Mfd  
636 translocation module and D7 along the DNA until it bumps into the RNAP. The  
637 corkscrewing translocation module unfolds the N-terminal half of the RH, wrapping it  
638 around the DNA as it goes. In this process D2 is separated from D7 but the UvrA-  
639 interacting surface of D2 is now occluded by the DNA.

640 See also Figure S4 and Tables S2 and S3.

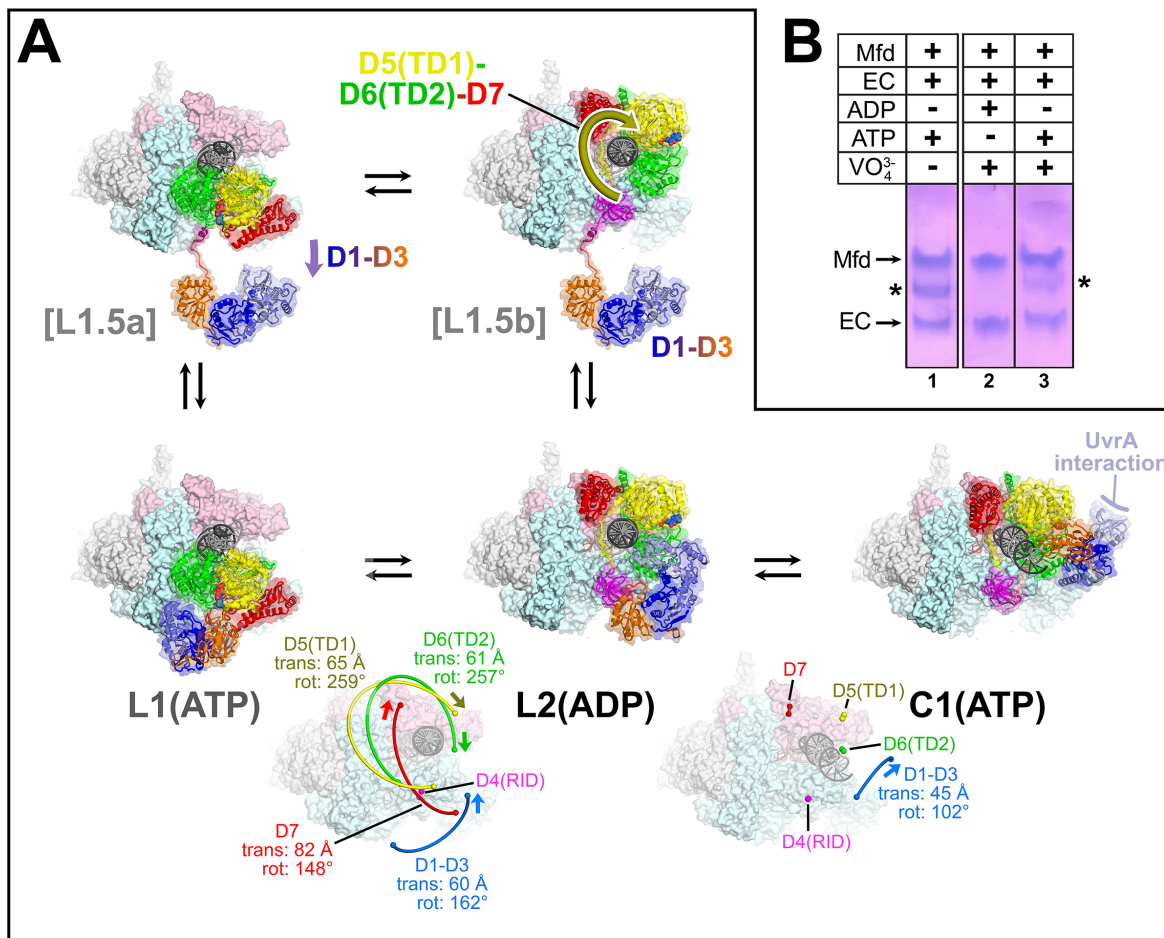

Kang et al., Figure 5

641  
642

643 **Figure 5. The L1(ATP) -> L2(ADP) -> I(ATP) transition.**

644 A. A back view of the Mfd-EC structures is shown, viewing down the axis of the  
645 upstream duplex DNA (the direction of transcription would be to the right). The RNAP is  
646 shown as a molecular surface with nucleic acids shown in cartoon format. Mfd is shown  
647 as transparent molecular surfaces surrounding the backbone ribbon. The bottom row  
648 shows the transition through the experimental structures [L1(ATP) -> L2(ADP) ->  
649 C1(ATP)]. Below that is denoted the translations and rotations of the Mfd domains  
650 associated with each transition (superimposed on the EC structure). The large  
651 translation/rotation of Mfd D5(TD1)-D6(TD2)-D7 in the L1(ATP) -> L2(ADP) transition  
652 must occur by clockwise corkscrewing around the DNA minor groove in order to leave  
653 behind the unfolded portion of the RH, which wraps around the DNA. The configuration  
654 of Mfd D1-D3 in L1(ATP) would block this transition and also result in the entanglement  
655 of linkers; thus, we propose that this transition is facilitated by transient intermediates  
656 [L1.5a] and [L1.5b], which have been modeled with displaced Mfd D1-D3 tethered by  
657 the long linker connecting D3 with the D4(RID). This allows the unencumbered  
658 transition of Mfd D5(TD1)-D6(TD2)-D7 from [L1.5a] to [L1.5b] (illustrated by the thick  
659 yellow arrow). Mfd D1-D3 then accommodates in a new configuration in L2(ADP). The  
660 L2(ADP) -> C1(ATP) transition involves another large translation and rotation of D1-D3  
661 (denoted), which finally exposes the Mfd-D2 UvrA-interacting surface.

662 B. Native gel electrophoretic mobility shift assay shows that a stable Mfd-EC complex  
663 (denoted by '\*') requires a minimum of one round of ATP hydrolysis (lane 3).

664 See also Figure S4 and Tables S2 and S3.

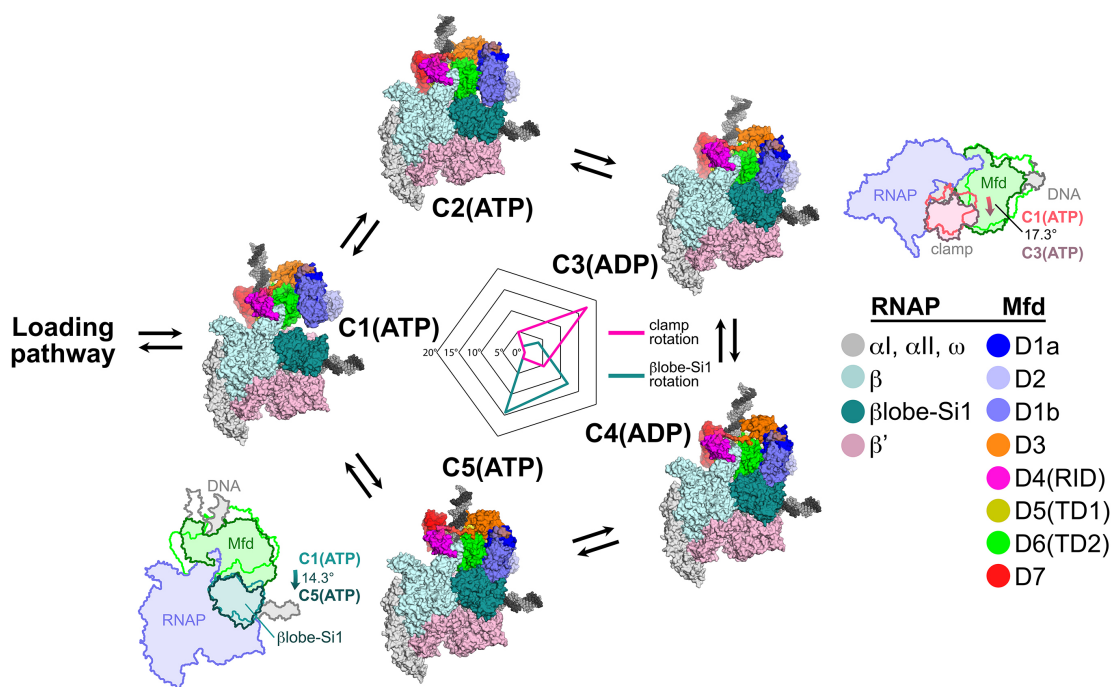

Kang et al., Figure 6

665

666 **Figure 6. Mfd motions during its nucleotide hydrolysis cycle cause significant**

667 **RNAP conformational changes.**

668 The completion of the Mfd loading pathway culminates in the formation of C1(ATP)

669 (Table S3A). Mfd then cycles through five distinct states in the order proposed here

670 (also see Table S3A and Figure S4A). In looping through this cycle, internal

671 conformational changes of Mfd are relatively small (involving primarily the nucleotide-

672 dependent shifts of D5(TD1) and D6(TD2) with respect to each other; see Figure 3), but

673 Mfd and the upstream duplex DNA as a whole wobble back and forth by about 30° on

674 the upstream face of the RNAP. These motions cause significant RNAP conformational

675 changes quantified in the radar plot in the middle. Using C1(ATP) as a reference

676 structure, the RNAP clamp of C3(ADP) is opened 17.3° (schematically illustrated in the

677 cartoon inset). The βlobe-Si1 domain of C5(ATP) is rotated 14.3° as illustrated.

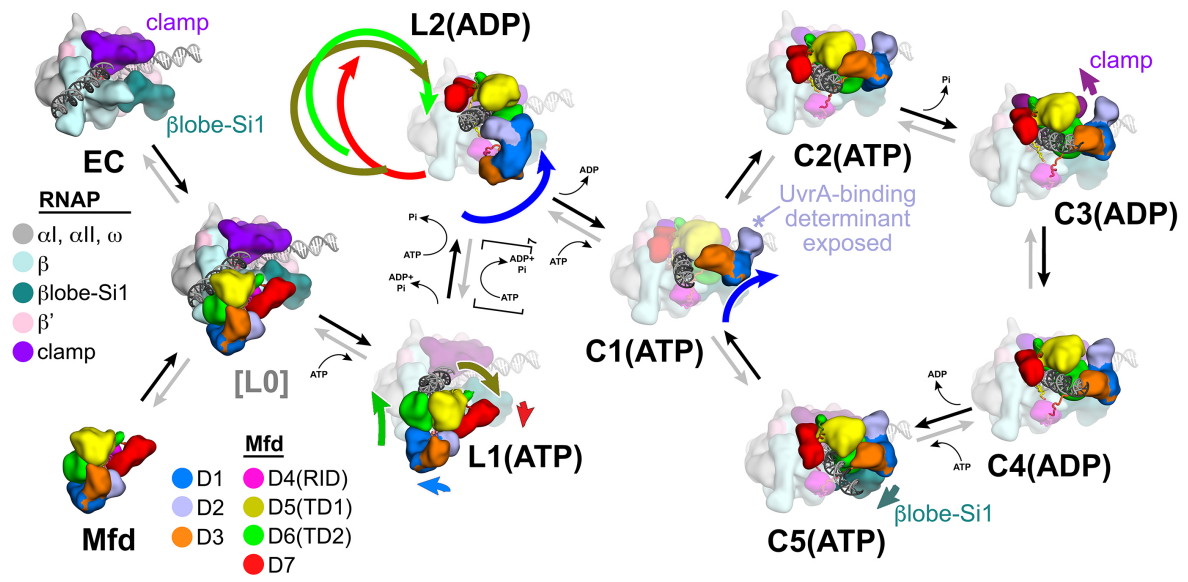

Kang et al., Figure 7

678  
 679

680 **Figure 7. Structural pathway for RNAP EC displacement by Mfd.**

681 Putative ordered pathway for Mfd-mediated displacement of the RNAP EC (see  
682 Figure S4A). Structures are shown as cartoons, with RNAP and Mfd-domain color-  
683 coding shown in the keys on the left. For most of the structures, domains that undergo  
684 the most significant conformational changes at each step are highlighted, and the  
685 relative direction and magnitude of the conformational changes are indicated by the  
686 thick, colored arrows. Starting at the left, the RNAP EC (top left) and apo-Mfd (bottom  
687 left) combine to form the putative encounter complex [L0] (see Figures 4A, B). In the  
688 [L0] -> L1(ATP) transition (Figure 4B), Mfd domains D5(TD1) and D6(TD2) rearrange to  
689 bind a molecule of ATP and engage fully with the upstream duplex DNA. D1-D3 and D7  
690 also make small rearrangements. In the L1(ATP) -> L2(ADP) transition, the Mfd  
691 translocation module [D5(TD1)/D6(TD2)] walks nine base-pairs in the downstream  
692 direction (into the page) by clockwise corkscrewing around the duplex DNA  
693 approximately 260°, hydrolyzing nine molecules of ATP in the process. The transition to  
694 C1(ATP) involves another accommodation of D1-D3 which finally exposes the UvrA-  
695 binding determinant of D2. We propose that the Mfd-EC complex then loops through an  
696 ATP hydrolysis cycle (C1 -> C2 -> C3 -> C4 -> C5 -> C1 -> ...) that works to overwind  
697 the upstream duplex DNA, facilitating RNA transcript release and transcription bubble  
698 collapse to displace the RNAP from the nucleic acids. During this cycle, movements of  
699 Mfd on the upstream duplex DNA also force conformational changes in the RNAP;  
700 clamp opening in C3(ADP), and  $\beta$ lobe-Si1 opening in C5(ATP). These RNAP  
701 conformational changes also serve to weaken the RNAP-nucleic acid contacts,  
702 facilitating RNAP release.

703 **STAR METHODS**

704

705 **LEAD CONTACT AND MATERIALS AVAILABILITY**

706 All unique/stable reagents generated in this study are available without restriction from  
707 the Lead Contact, Seth A. Darst ([darst@rockefeller.edu](mailto:darst@rockefeller.edu)).

708

709 **EXPERIMENTAL MODEL AND SUBJECT DETAILS**

710 RNAP core ( $\alpha_2\beta\beta'\omega$ ) and Mfd are proteins found in *Eco*. For protein  
711 expression, *Eco* BL21(DE3) [*Eco* str. B F<sup>-</sup> *ompT gal dcm lon hsdS<sub>B</sub>(r<sub>B</sub><sup>-</sup>m<sub>B</sub><sup>-</sup>)*  $\lambda$ (DE3  
712 [*lacI lacUV5-T7p07 ind1 sam7 nin5*]) [*malB*<sup>+</sup>]<sub>K-12</sub>( $\lambda^S$ )] was used.

713

714 **METHOD DETAILS**

715 Structural biology software was accessed through the SBGrid consortium (Morin et al.,  
716 2013).

717

718 **Protein Expression and Purification**

719 *Eco* RNAP (harboring full-length  $\alpha$ -subunits) was purified as described previously (Chen  
720 et al., 2019a). A pET-based plasmid overexpressing each subunit of *Eco* RNAP (full-  
721 length  $\alpha$ ,  $\beta$ ,  $\omega$ ) as well as  $\beta'$ -PPX-His10 (PPX; PreScission protease site, LEVLFQGP,  
722 GE Healthcare Life Sciences) was co-transformed with a pACYCDuet-1 plasmid  
723 containing *Eco* rpoZ (encoding  $\omega$ ) into *Eco* BL21(DE3) (Novagen). Protein expression



724 was induced with 1 mM isopropyl  $\beta$ -D-thiogalactopyranoside (IPTG) for 4 hr at 30°C.  
725 Cells were harvested and lysed with a French Press (Avestin) at 4°C. Lysate was  
726 precipitated using polyethyleneimine [PEI, 10% (w/v), pH 8.0, Acros Organics]. Pellets  
727 were washed and RNAP was eluted. The PEI elutions were precipitated with  
728 ammonium sulfate. Pellets were harvested, resuspended and loaded on to HiTrap IMAC  
729 HP columns (GE Healthcare Life Sciences) for purification by Ni<sup>2+</sup>-affinity  
730 chromatography. Bound RNAP was washed on column, eluted and dialyzed. Dialyzed  
731 RNAP was loaded onto a Biorex-70 column (Bio-Rad) for purification by ion exchange  
732 chromatography. Eluted RNAP was concentrated by centrifugal filtration, then loaded  
733 onto a HiLoad 26/600 Superdex 200 column (GE Healthcare Life Sciences) for  
734 purification by size exclusion chromatography. Purified RNAP was supplemented with  
735 glycerol to 20% (v/v), flash frozen in liquid N<sub>2</sub>, and stored at -80°C.

736 *Eco Mfd* was purified as described previously (Deaconescu and Darst, 2005). A  
737 pET-based plasmid overexpressing N-terminal His<sub>6</sub>-tagged *Eco Mfd* was transformed  
738 into Rosetta(DE3)pLysS cells (Novagen). Protein expression was induced with  
739 1 mM isopropyl  $\beta$ -D-1-thiogalactopyranoside (IPTG) for 4 hour at 30 °C, and the cells  
740 were harvested and lysed in a buffer containing 50 mM Tris, pH 8.0, 500 mM NaCl,  
741 15 mM imidazole, 10% (v/v) glycerol, 2 mM  $\beta$ -mercaptoethanol ( $\beta$ -ME), 1 mM PMSF,  
742 and protease inhibitor cocktail (cOmplete, EDTA-free protease inhibitor cocktail,  
743 Roche). For purification, the clarified lysate was loaded onto a Ni<sup>2+</sup>-charged Hitrap IMAC  
744 (GE Healthcare Life Sciences) column and the protein was eluted using 0 – 200 mM  
745 imidazole gradient. The elutions were dialyzed in a buffer containing 20 mM Tris,  
746 pH 8.0, 100 mM NaCl, 10% (v/v) glycerol, 5 mM EDTA, and 10 mM  $\beta$ -ME, and loaded

747 onto a Hitrap Heparin (GE Healthcare Life Sciences) column. The protein was eluted  
748 with a 100 mM – 2 M NaCl gradient, and further purified by size exclusion  
749 chromatography on a HiLoad 16/600 Superdex200 (GE Healthcare Life Sciences)  
750 column in a buffer containing 20 mM Tris, pH 8.0, 500 mM NaCl, and 10 mM DTT.  
751 Purified Mfd was supplemented with glycerol to 20% (v/v), flash frozen in liquid N<sub>2</sub>, and  
752 stored at –80°C.

753

#### 754 **Assembly of ECs and Mfd-EC complexes**

755 To assemble ECs, the RNA and the t-strand DNA (Figure 1A) were annealed at a 1:1  
756 molar ratio in a thermocycler (95 °C for 2 min, 75 °C for 2 min, 45 °C for 5 min, followed  
757 by cooling to 25 °C at 1 °C/min). Purified *Eco* RNAP was buffer exchanged into  
758 transcription buffer (20 mM Tris, pH 8.0, 150 mM KCl, 10 mM MgCl<sub>2</sub>, 5 mM DTT). The  
759 annealed DNA-RNA hybrid was added to the buffer-exchanged *Eco* RNAP at a 1.2:1  
760 molar ratio, and incubated for 15 minutes at room temperature. Then the nt-strand DNA  
761 was added and incubated for 10 minutes. To assemble Mfd-EC complexes, 2 mM ATP  
762 was added to the EC, and purified Mfd was added at a 1:2 ratio.

763

#### 764 **Biochemical analysis of Mfd/EC complexes**

765 EC-Mfd complexes were visualized by EMSA. ECs were incubated with 2-fold molar  
766 excess of Mfd and 2 mM ATP at room temperature for five minutes in transcription  
767 buffer. Samples were diluted with 6X loading dye containing 20 mM Tris, pH 8.0, xylene  
768 cyanol, bromophenol blue, and 30% (v/v) glycerol and loaded onto 4.5% (29:1

769 acrylamide:bis-acrylamide) polyacrylamide native gels at 4°C in 1X TBE (89 mM Tris,  
770 89 mM boric acid, 2 mM EDTA).

771 To prepare  $\text{VO}_4^{3-}$ , sodium orthovanadate (Sigma-Aldrich) was dissolved in water,  
772 and the pH was adjusted to 10 using HCl, resulting in a dark orange color. The solution  
773 was boiled for 2 min until it turned colorless, then cooled to room temperature. The  
774 process of adjusting the pH and boiling was repeated two more times. The  $\text{VO}_4^{3-}$   
775 concentration was determined spectroscopically using its molar extinction coefficient of  
776  $2,925 \text{ M}^{-1}\text{cm}^{-1}$ . The solution was stored frozen at  $-80^\circ\text{C}$  until further use. Reactions with  
777 ATP- $\text{VO}_4^{3-}$  contained 8 mM sodium orthovanadate (pH 10). Alternatively, a 10 mM  
778 mixture of ADP- $\text{VO}_4^{3-}$  was added to the ECs and Mfd for a final concentration of 2 mM.

779 For *in vitro* EC displacement assays (Figure S4C), we followed the procedures of  
780 (Chambers, 2003) with some modifications. Stalled ECs were formed by nucleotide  
781 starvation on a 529 base-pair RasI-SmaI fragment of plasmid pAR1707 (Levin et al.,  
782 1987) end-labelled using T4 polynucleotide kinase and  $[\gamma\text{-}^{32}\text{P}]\text{ATP}$ . ECs stalled at +20  
783 were formed by initiating with the dinucleotide ApU and ATP, CTP, and GTP (excluding  
784 UTP), and with the addition of the chain-terminator 3'-deoxy-UTP. Complexes were  
785 analysed by EMSAs using 4.5% polyacrylamide (37.5:1 acrylamide/bisacrylamide) in  
786 1X TBE at 4°C. Radiolabelled bands were detected using a phosphor screen and  
787 quantified using Imagequant software (Molecular Dynamics). *Eco* RNAP holoenzyme  
788 was assembled by incubating *Eco* RNAP (250 nM final) with  $\sigma^{70}$  (1.25  $\mu\text{M}$  final) at 37°C  
789 for 20 min. The  $^{32}\text{P}$ -labeled dsDNA linear scaffold (0.4 nM final) was combined with  
790 holoenzyme (10 nM final) at 37°C for 10 minutes before ApU dinucleotide  
791 (200  $\mu\text{M}$  final), ATP (2 mM final), CTP (50  $\mu\text{M}$  final), GTP (50  $\mu\text{M}$  final), and 3'-deoxy-

792 UTP (100  $\mu$ M final). Heparin (Sigma-Aldrich) was also added (10  $\mu$ g/mL final) to ensure  
793 single-round transcription. After 10 minutes of incubation at 37°C, Mfd (250 nM final)  
794 was added to activate stalled RNAP displacement and translocation. Samples were  
795 collected at different timepoints, combined with excess EDTA to stop ATPase activity,  
796 and placed on ice before gel loading. The assays were conducted without and with the  
797 presence of  $\text{VO}_4^{3-}$  (20 mM final).

798

### 799 **Native mass spectrometry (nMS) analysis**

800 For the EC + Mfd sample, 7  $\mu$ M EC was incubated with 3.5  $\mu$ M Mfd (2:1 molar ratio) in  
801 transcription buffer with 2 mM ATP for 1 min at RT. The nonvolatile buffer components,  
802 including ATP, needed to be removed prior to nMS analysis because these components  
803 can form nonspecific adductions on protein complexes and degrade spectral quality.  
804 The EC and EC + Mfd samples were then buffer-exchanged into nMS solution  
805 (500 mM ammonium acetate, pH 7.5, 0.01% Tween-20) using Zeba microspin desalting  
806 columns (Thermo Fisher Scientific) with a 40-kDa MWCO (Olinares et al., 2016).

807 For nMS analysis, 2–3  $\mu$ L of the buffer-exchanged sample was loaded into a  
808 gold-coated quartz emitter that was prepared in-house and then electrosprayed into an  
809 Exactive Plus EMR instrument (Thermo Fisher Scientific) with a static nanospray source  
810 (Olinares and Chait, 2019). The MS parameters used include: spray voltage, 1.2–  
811 1.3 kV; capillary temperature, 125 °C; in-source dissociation, 10 V; S-lens RF level, 200;  
812 resolving power, 8,750 at  $m/z$  of 200; AGC target,  $1 \times 10^6$ ; maximum injection time,  
813 200 ms; number of microscans, 5; injection flatapole, 8 V; interflatapole, 4 V; bent  
814 flatapole, 4 V; high energy collision dissociation (HCD), 180 – 200 V; ultrahigh vacuum

815 pressure,  $6 - 7 \times 10^{-10}$  mbar; total number of scans, at least 100. Mass calibration in  
816 positive EMR mode was performed using cesium iodide. For data processing, the  
817 acquired MS spectra were visualized using Thermo Xcalibur Qual Browser (versions  
818 3.0.63 and 4.2.47). MS spectra deconvolution was performed either manually or using  
819 the software UniDec versions 3.2 and 4.1 (Marty et al., 2015; Reid et al., 2019). The  
820 deconvolved spectra obtained from UniDec were plotted using the m/z software  
821 (Proteometrics LLC). Experimental masses were reported as the average mass  $\pm$   
822 standard deviation (S.D.) across all the calculated mass values within the observed  
823 charge state series. Mass accuracies were calculated as the % difference between the  
824 measured and expected masses relative to the expected mass. The measured masses  
825 for the corresponding complexes (with mass accuracies reported in parentheses)  
826 include EC:  $437,680 \pm 20$  Da (0.016%) for the EC only sample and EC + 1 Mfd:  
827  $570,360 \pm 20$  Da (0.03%), EC:  $437,700 \pm 20$  Da (0.02%),  $\alpha_2\beta$  subcomplex:  
828  $223,700 \pm 3$  Da (0.02%), and Mfd:  $132,582 \pm 8$  Da (0.003%) for the EC sample  
829 incubated with Mg-ATP and Mfd.

830

### 831 **Preparation of Mfd-EC Cryo-EM grids**

832 For cryo-EM grid preparation, ECs prepared as above were purified over a Superose 6  
833 INCREASE gel filtration column (GE Healthcare Life Sciences) equilibrated with  
834 transcription buffer. ATP (2 mM) and 2-fold excess Mfd were added and incubated for  
835 1 min before adding {3-([3-cholamidopropyl]dimethylammonio)-2-hydroxy-1-  
836 propanesulfonate} (CHAPSO; Anatrace) to a final concentration of 8 mM (Chen et al.,  
837 2019b). The final buffer condition for all the cryo-EM samples was the same as

838 transcription buffer. C-flat holey carbon grids (CF-1.2/1.3-4Au, Protochips) were glow-  
839 discharged for 20 sec prior to the application of 3.5  $\mu$ L of the samples. Using a  
840 Vitrobot Mark IV (Thermo Fisher Scientific Electron Microscopy), grids were blotted and  
841 plunge-froze into liquid ethane with 100% chamber humidity at 22°C.

842

### 843 **Cryo-EM data acquisition and processing**

844 For the cryo-EM structure determination of the Mfd-EC, two datasets were collected and  
845 combined (Figure S1). In each data collection, grids were imaged using a 300 keV Titan  
846 Krios (Thermo Fisher Scientific Electron Microscopy) equipped with a K2 Summit direct  
847 electron detector (Gatan, Pleasanton, CA). Images were recorded with Serial EM  
848 (Mastrorade, 2005) with a pixel size of 1.3 Å over a defocus range of -0.8 to -2.4  $\mu$ m.  
849 Movies were recorded in super-resolution mode at 8 electrons/physical pixel/s in dose-  
850 fractionation mode with subframes of 0.2 s over a 10 s exposure (50 frames) to give a  
851 total dose of 80 electrons/physical pixel or 47.3 electrons/Å<sup>2</sup>. Dose-fractionated movies  
852 were gain-normalized, drift-corrected, binned, summed, and dose-weighted using  
853 MotionCor2 (Zheng et al., 2017). The contrast transfer function was estimated for each  
854 summed image using Gctf (Zhang, 2016). Gautomatch (developed by K. Zhang, MRC  
855 Laboratory of Molecular Biology, Cambridge, UK, [http://www.mrc-](http://www.mrc-imb.cam.ac.uk/kzhang/Gautomatch)  
856 [imb.cam.ac.uk/kzhang/Gautomatch](http://www.mrc-imb.cam.ac.uk/kzhang/Gautomatch)) was used to pick particles without templates.  
857 Picked particles from each dataset were extracted from the dose-weighted images in  
858 RELION (Scheres, 2012) using a box size of 300 pixels and subjected to  
859 2D classification in RELION to exclude false particles. The selected particles from 2D  
860 classification were transferred to CryoSPARC (Punjani et al., 2017) to perform

861 heterogeneous refinement with multiple 3D references to separate Mfd-EC complexes  
862 from isolated EC and Mfd particles. For the heterogeneous refinement, cryo-EM maps  
863 of *Eco* EC [EMD-8585; (Kang et al., 2017), Mfd-EC, and isolated Mfd (the latter two  
864 generated from a subset of the data by *ab initio* reconstruction) were used as templates  
865 (each low-pass filtered to 30 Å resolution). The class representing Mfd-EC was further  
866 refined in CryoSPARC homogeneous refinement, yielding 3.9 Å and 3.6 Å nominal  
867 resolution maps from the first and second datasets, respectively. The refined particles  
868 from the first dataset were transferred to RELION for 3D auto-refinement, CTF  
869 refinement, Bayesian polishing, and 3D autorefinement before being combined with the  
870 particles from the second dataset. The resulting 594,435 particles were 3D autorefined  
871 in RELION for a consensus refinement, yielding a 3.86 Å nominal resolution map. A  
872 second round of CTF refinement, Bayesian polishing, and 3D autorefinement improved  
873 the resolution to 3.64 Å. By using focused classification around the Mfd region, eight  
874 classes were generated with distinct Mfd conformations. Among the eight classes, two  
875 classes were discarded because they could not be refined further. Four of the classes  
876 were further refined using RELION 3D autorefinement to yield C1, C3, C4, and C5  
877 (Figure S1). The remaining two classes were further sorted using partial signal  
878 subtraction (Bai et al., 2015) of the region outside of Mfd and the RNAP  $\alpha$ -protrusion,  
879 then classifying these subtracted particles using a mask encompassing Mfd and the  
880 RNAP  $\beta$ -protrusion density, resulting in L1, L2, and C2 (Figure S1). In total, the seven  
881 resulting maps showed well-defined EC density but variable quality maps for the Mfd  
882 component, indicating that the alignments were dominated by the EC portion of the  
883 complex. Therefore, to better resolve the density around Mfd, particles from each class

884 were imported into cryoSPARC and refined using cryoSPARC Non-uniform Refinement  
885 (Punjani et al., 2019). Using the resulting maps, masks around Mfd were generated for  
886 cryoSPARC Local Refinement. The fulcrum points (alignment centers) for each of these  
887 masks were defined using 'Volume Tracer' in UCSF Chimera (Pettersen et al., 2004).  
888 Each class from the Non-uniform Refinement was subjected to Local Refinement using  
889 their respective Mfd mask and fulcrum point. The local refinements resulted in better  
890 resolved Mfd density for each class with the following nominal resolutions in this region:  
891 L1 (ATP, 6.6 Å), L2 (ADP, 6.7 Å), C1 (ATP, 5.2 Å), C2 (ADP, 3.5 Å), C3 (ADP, 4.4 Å),  
892 C4 (ADP, 3.8 Å) and C5 (ADP, 3.3 Å).

893         The EC-centered cryo-EM maps from RELION and the Mfd-centered maps from  
894 cryoSPARC were combined using the PHENIX `combine_focused_maps` command  
895 (Adams et al., 2010). The procedure that gave the highest quality maps was as follows:  
896 1) Coordinates were rigid body refined into each map. For the combination step: 1) For  
897 the EC-centered coordinates, the occupancies of the EC-RNAP, the EC nucleic acids,  
898 and Mfd-D4(RID) were set to 1.0, while the occupancies for the rest of Mfd and the  
899 upstream duplex DNA were set to 0; 2) For the Mfd-centered coordinates, the  
900 occupancies of the entire Mfd, the RNAP  $\beta$ -protrusion, and the upstream duplex DNA  
901 were set to 1.0, while the rest of the EC was set to occupancy=0. Thus, in the combined  
902 maps, the EC density and EC nucleic acids came from the EC-centered cryo-EM maps,  
903 while Mfd and the upstream duplex DNA density came from the Mfd-centered maps,  
904 and the density for the Mfd-D4(RID) and the RNAP  $\beta$ -protrusion were weighted  
905 according to the `combine_focused_maps` algorithm. These combined maps were the  
906 most interpretable over the entirety of each complex and were therefore used for



907 building, refinement, statistics reporting (Table S1), and deposition in the Electron  
908 Microscopy Data Bank (EMDB). RELION 3D auto-refinement and post-processing of  
909 the polished particles resulted in structures with the following nominal resolutions:  
910 L1 (ATP, 4.1 Å), L2 (ADP, 4.0 Å), C1 (ATP, 3.9 Å), C2 (ADP, 3.9 Å), C3 (ADP, 3.2 Å),  
911 C4 (ADP, 3.6 Å) and C5 (ADP, 3.3 Å). Local resolution calculations were done using  
912 blocres and blocfilt from the Bsoft package (Cardone et al., 2013).

913

#### 914 **Model building and refinement**

915 For initial models of the complexes, the *Eco* EC structure [PDB ID 6ALF (Kang et al.,  
916 2017)] was manually fit into the combined cryo-EM density maps using Chimera  
917 (Pettersen et al., 2004) and real-space refined using Phenix (Adams et al., 2010). The  
918 DNAs and Mfd domains [taken from 2EYQ (Deaconescu et al., 2006)] were mostly built  
919 *de novo* based on the density maps. For real-space refinement, rigid body refinement  
920 was followed by all-atom and B-factor refinement with Ramachandran and secondary  
921 structure restraints. Refined models were inspected and modified in Coot (Emsley and  
922 Cowtan, 2004).

923

#### 924 **Superimposition of structures and calculation of rmsds**

925 For the statistics presented in Tables S2A, S2B, and S3A,  $\alpha$ -carbons of the specified  
926 structural components were superimposed using the PyMOL align command (the  
927 resulting rmsd is listed in the 'align' column, with the number of  $\alpha$ -carbon atoms used for  
928 the rmsd calculation listed underneath in parentheses). The rmsd for all of the  $\alpha$ -carbon

929 atoms was then determined using the PyMOL 'rms\_cur' command (listed under the  
930 'rms\_cur' column).

931

### 932 **Quantification and statistical analysis**

933 The nMS spectra were visualized using Thermo Xcalibur Qual Browser (versions 3.0.63  
934 and 4.2.27), deconvolved using UniDec versions 3.2 and 4.1 (Marty et al., 2015; Reid et  
935 al., 2019) and plotted using the m/z software (Proteometrics LLC, New York, NY).  
936 Experimental masses (Figure 1D) were reported as the average mass  $\pm$  standard  
937 deviation across all the calculated mass values obtained within the observed charge  
938 state distribution.

939 ImageQuant 5.2 (GE Healthcare, Pittsburgh PA) was used to visualize and  
940 quantify gels. To quantify the EC displacement assays (Figure S4C), mean values and  
941 the standard error of the mean from at three independent measurements were  
942 calculated.

943 Structural biology software was accessed through the SBGrid consortium (Morin  
944 et al., 2013). The local resolution of the cryo-EM maps (Figure S2) was estimated using  
945 blocres (Cardone et al., 2013) with the following parameters: box size 15, verbose 7,  
946 sampling 1.3, and cutoff 0.5. The quantification and statistical analyses for model  
947 refinement and validation were generated using MolProbity (Chen et al., 2010) and  
948 PHENIX (Adams et al., 2010).

949

950

951 **Data and code availability**

952 The cryo-EM density maps have been deposited in the EMDataBank under accession  
953 codes EMD-21996 [L1(ATP)], EMD-22006 [L2(ADP)], EMD-22012 [I(ATP)], EMD-  
954 22039 [II(ATP)], EMD-22043 [III(ADP)], EMD-22044 [IV(ADP)], and EMD-  
955 22045 [V(ATP)]. The atomic coordinates have been deposited in the Protein Data Bank  
956 under accession codes 6X26 [L1(ATP)], 6X2F [L2(ADP)], 6X2N [I(ATP)], 6X43 [II(ATP)],  
957 6X4W [III(ADP)], 6XYY [IV(ADP)], and 6X5Q [V(ATP)].

958 **SUPPLEMENTAL INFORMATION**

959

960 **Structural basis for transcription complex disruption by the Mfd**  
961 **translocase**

962

963 **Jin Young Kang<sup>1,3,4</sup>, Eliza Llewellyn<sup>1,3</sup>, James Chen<sup>1</sup>, Paul Dominic B. Olinares<sup>2</sup>,**  
964 **Joshua Brewer<sup>1</sup>, Brian T. Chait<sup>2</sup>, Elizabeth A. Campbell<sup>1</sup>, Seth A. Darst<sup>1,5,6</sup>**

965

966 <sup>1</sup>Laboratory of Molecular Biophysics, The Rockefeller University, New York, NY 10065,  
967 USA.

968 <sup>2</sup>Laboratory of Mass Spectrometry and Gaseous Ion Chemistry, The Rockefeller  
969 University, New York, NY 10065, USA.

970 <sup>3</sup>Contributed equally

971 <sup>4</sup>Present address: Department of Chemistry KAIST, 291 Daehak-ro, Yuseong-gu,  
972 Daejeon 34141, Republic of Korea

973 <sup>5</sup>Lead contact: [darst@rockefeller.edu](mailto:darst@rockefeller.edu)

974 <sup>6</sup>Correspondence to: [darst@rockefeller.edu](mailto:darst@rockefeller.edu)

975

976 Supplemental Information includes 4 figures, 3 tables, and 2 movies.

977  
978**Table S1 | Cryo-EM data collection, refinement and validation statistics. Related to Figure 2.**

| <b>Data collection and processing</b>  |                                                        |                                                        |                                                        |                                                        |                                                        |                                                        |                                                        |
|----------------------------------------|--------------------------------------------------------|--------------------------------------------------------|--------------------------------------------------------|--------------------------------------------------------|--------------------------------------------------------|--------------------------------------------------------|--------------------------------------------------------|
| Voltage (kV)                           |                                                        |                                                        |                                                        | 300                                                    |                                                        |                                                        |                                                        |
| Electron exposure (e-/Å <sup>2</sup> ) |                                                        |                                                        |                                                        | 60                                                     |                                                        |                                                        |                                                        |
| Defocus range (µm)                     |                                                        |                                                        |                                                        | -0.8 to -2.4                                           |                                                        |                                                        |                                                        |
| Pixel size (Å)                         |                                                        |                                                        |                                                        | 1.3                                                    |                                                        |                                                        |                                                        |
| Symmetry imposed                       |                                                        |                                                        |                                                        | C1                                                     |                                                        |                                                        |                                                        |
| Initial particle images (no.)          |                                                        |                                                        |                                                        |                                                        |                                                        |                                                        |                                                        |
| Structure                              | L1                                                     | L2(ADP)                                                | I(ATP)                                                 | II(ATP)                                                | III(ADP)                                               | IV(ADP)                                                | V(ATP)                                                 |
| Final particle images (no.)            | 13,013                                                 | 16,067                                                 | 23,856                                                 | 85,840                                                 | 47,312                                                 | 66,617                                                 | 102,741                                                |
| Map resolution (Å)                     | 4.1                                                    | 4.0                                                    | 3.9                                                    | 3.6                                                    | 3.8                                                    | 3.6                                                    | 3.3                                                    |
| FSC threshold 0.143                    |                                                        |                                                        |                                                        |                                                        |                                                        |                                                        |                                                        |
| Map resolution range (Å)               | 3.4 - 10                                               | 3.5 - 10                                               | 3.3 - 10                                               | 3.0 - 9                                                | 3.3 - 10                                               | 3.1 - 9.5                                              | 2.8 - 8                                                |
| EMDB accession code                    | EMD-21996                                              | EMD-22006                                              | EMD-22012                                              | EMD-22039                                              | EMD-22043                                              | EMD-22044                                              | EMD-22045                                              |
| <b>Refinement</b>                      |                                                        |                                                        |                                                        |                                                        |                                                        |                                                        |                                                        |
| <b>Model composition</b>               |                                                        |                                                        |                                                        |                                                        |                                                        |                                                        |                                                        |
| Non-hydrogen atoms                     | 35,968                                                 | 36,058                                                 | 36,078                                                 | 36,055                                                 | 36,019                                                 | 36,086                                                 | 36,075                                                 |
| Protein residues                       | 4,314                                                  | 4,316                                                  | 4,316                                                  | 4,316                                                  | 4,316                                                  | 4,316                                                  | 4,315                                                  |
| Nucleic acid residues                  | 113                                                    | 113                                                    | 113                                                    | 111                                                    | 112                                                    | 113                                                    | 113                                                    |
| Ligands                                | 4 (1 Mg <sup>2+</sup> ,<br>2 Zn <sup>2+</sup> , 1 ATP) | 4 (1 Mg <sup>2+</sup> , 2 Zn <sup>2+</sup> ,<br>1 ADP) | 4 (1 Mg <sup>2+</sup> ,<br>2 Zn <sup>2+</sup> , 1 ATP) | 5 (2 Mg <sup>2+</sup> ,<br>2 Zn <sup>2+</sup> , 1 ATP) | 4 (1 Mg <sup>2+</sup> ,<br>2 Zn <sup>2+</sup> , 1 ADP) | 5 (2 Mg <sup>2+</sup> , 2 Zn <sup>2+</sup> ,<br>1 ADP) | 5 (2 Mg <sup>2+</sup> , 2 Zn <sup>2+</sup> ,<br>1 ATP) |
| <b>B factors (Å<sup>2</sup>)</b>       |                                                        |                                                        |                                                        |                                                        |                                                        |                                                        |                                                        |
| Protein                                | 142.0                                                  | 97.54                                                  | 89.23                                                  | 52.86                                                  | 127.5                                                  | 82.27                                                  | 66.68                                                  |
| Nucleic acid                           | 202.1                                                  | 182.9                                                  | 145.0                                                  | 110.4                                                  | 202.9                                                  | 148.5                                                  | 113.0                                                  |
| Ligands                                | 258.7                                                  | 89.94                                                  | 87.36                                                  | 36.59                                                  | 121.0                                                  | 79.73                                                  | 47.05                                                  |
| <b>R.m.s. deviations</b>               |                                                        |                                                        |                                                        |                                                        |                                                        |                                                        |                                                        |
| Bond lengths (Å)                       | 0.006                                                  | 0.007                                                  | 0.010                                                  | 0.007                                                  | 0.010                                                  | 0.009                                                  | 0.004                                                  |
| Bond angles (°)                        | 0.839                                                  | 0.873                                                  | 1.003                                                  | 0.783                                                  | 0.975                                                  | 0.825                                                  | 0.652                                                  |
| <b>Validation</b>                      |                                                        |                                                        |                                                        |                                                        |                                                        |                                                        |                                                        |
| MolProbity score                       | 2.53                                                   | 2.54                                                   | 2.61                                                   | 2.22                                                   | 2.59                                                   | 2.32                                                   | 2.72                                                   |
| Clashscore                             | 27.07                                                  | 27.91                                                  | 29.14                                                  | 14.4                                                   | 25.79                                                  | 18.05                                                  | 11.93                                                  |
| Poor rotamers (%)                      | 0.70                                                   | 0.47                                                   | 0.55                                                   | 0.47                                                   | 0.75                                                   | 0.88                                                   | 7.74                                                   |
| <b>Ramachandran plot<sup>a</sup></b>   |                                                        |                                                        |                                                        |                                                        |                                                        |                                                        |                                                        |
| Favored (%)                            | 88.96                                                  | 88.54                                                  | 86.21                                                  | 89.66                                                  | 87.64                                                  | 91.1                                                   | 92.2                                                   |
| Allowed (%)                            | 10.71                                                  | 11.06                                                  | 13.70                                                  | 10.15                                                  | 12.08                                                  | 8.86                                                   | 7.57                                                   |
| Outliers (%)                           | 0.33                                                   | 0.40                                                   | 0.09                                                   | 0.19                                                   | 0.28                                                   | 0.40                                                   | 0.23                                                   |
| PDB accession code                     | 6X26                                                   | 6X2F                                                   | 6X2N                                                   | 6X43                                                   | 6X4W                                                   | 6XYY                                                   | 6X5Q                                                   |

979  
980 <sup>a</sup> Refinement/validation parameters as calculated by PHENIX real\_space\_refine (Adams et al., 2010) and MOLPROBITY (Chen et al., 2010)

981 **Table S2. Conformational changes for the RNAP (A) and Mfd (B) components of the Mfd-EC structures.**  
 982 **Related to Figure 2.**

983 **Table S2A. Conformational changes for the RNAP component of the Mfd-EC structures.**  
 984

|         | L2(ADP)         |                | C1(ATP)         |                 | C2(ATP)         |                 | C3(ADP)         |                 | C4(ADP)         |                 | C5(ATP)         |                 |
|---------|-----------------|----------------|-----------------|-----------------|-----------------|-----------------|-----------------|-----------------|-----------------|-----------------|-----------------|-----------------|
|         | align           | rms_cur        | align           | rms_cur         | align           | rms_cur         | align           | rms_cur         | align           | rms_cur         | align           | rms_cur         |
| L1(ATP) | 0.556<br>(2798) | 0.82<br>(3171) | 0.596<br>(2832) | 0.877<br>(3172) | 0.661<br>(2536) | 1.46<br>(3169)  | 0.707<br>(2362) | 3.638<br>(3164) | 0.642<br>(2318) | 2.203<br>(3171) | 0.553<br>(2583) | 2.188<br>(3172) |
| L2(ADP) |                 |                | 0.456<br>(2860) | 0.585<br>(3171) | 0.586<br>(2409) | 1.318<br>(3168) | 0.711<br>(2322) | 3.61<br>(3163)  | 0.603<br>(2332) | 2.244<br>(3170) | 0.565<br>(2625) | 2.313<br>(3171) |
| C1(ATP) |                 |                |                 |                 | 0.544<br>(2393) | 1.24<br>(3169)  | 0.693<br>(2279) | 3.514<br>(3164) | 0.548<br>(2328) | 2.177<br>(3171) | 0.522<br>(2592) | 2.3<br>(3172)   |
| C2(ATP) |                 |                |                 |                 |                 |                 | 0.546<br>(2343) | 2.69<br>(3167)  | 0.303<br>(2480) | 1.818<br>(3168) | 0.346<br>(2319) | 2.244<br>(3169) |
| C3(ADP) |                 |                |                 |                 |                 |                 |                 |                 | 0.57<br>(2326)  | 2.669<br>(3163) | 0.585<br>(2351) | 3.518<br>(3164) |
| C4(ADP) |                 |                |                 |                 |                 |                 |                 |                 |                 |                 | 0.393<br>(2492) | 1.044<br>(3171) |

986 **Table S2B. Conformational changes for the Mfd component of the Mfd-EC structures.**  
 987

|         | L1(ATP)        |                 | L2(ADP)         |                  | C1(ATP)          |                  | C2(ATP)          |                  | C3(ADP)          |                  | C4(ADP)          |                  | C5(ATP)         |                  |
|---------|----------------|-----------------|-----------------|------------------|------------------|------------------|------------------|------------------|------------------|------------------|------------------|------------------|-----------------|------------------|
|         | align          | rms_cur         | align           | rms_cur          | align            | rms_cur          | align            | rms_cur          | align            | rms_cur          | align            | rms_cur          | align           | rms_cur          |
| 2EYQ    | 4.998<br>(916) | 9.179<br>(1113) | 19.606<br>(889) | 34<br>(1106)     | 12.002<br>(897)  | 36.909<br>(1107) | 13.519<br>(907)  | 37.193<br>(1115) | 18.508<br>(940)  | 36.746<br>(1109) | 16.586<br>(928)  | 35.991<br>(1109) | 10.253<br>(891) | 36.375<br>(1109) |
| L1(ATP) |                |                 | 20.303<br>(910) | 32.199<br>(1115) | 13.454<br>(901)  | 37.08<br>(1110)  | 16.895<br>(930)  | 36.536<br>(1114) | 14.825<br>(905)  | 38.634<br>(1114) | 13.717<br>(900)  | 37.494<br>(1112) | 12.331<br>(898) | 36.58<br>(1112)  |
| L2(ADP) |                |                 |                 |                  | 20.605<br>(1032) | 26.011<br>(1135) | 22.779<br>(1075) | 25.75<br>(1131)  | 20.421<br>(1076) | 23.088<br>(1139) | 21.076<br>(1140) | 21.205<br>(1139) | 24.73<br>(1140) | 24.818<br>(1135) |
| C1(ATP) |                |                 |                 |                  |                  |                  | 0.827<br>(930)   | 3.954<br>(1134)  | 3.686<br>(1020)  | 5.674<br>(1138)  | 4.714<br>(976)   | 7.676<br>(1136)  | 0.747<br>(925)  | 7.109<br>(1136)  |
| C2(ATP) |                |                 |                 |                  |                  |                  |                  |                  | 3.888<br>(1031)  | 5.171<br>(1136)  | 4.449<br>(1003)  | 7.294<br>(1134)  | 0.667<br>(915)  | 5.769<br>(1132)  |
| C3(ADP) |                |                 |                 |                  |                  |                  |                  |                  |                  |                  | 1.453<br>(953)   | 5.61<br>(1140)   | 3.637<br>(938)  | 7.392<br>(1138)  |
| C4(ADP) |                |                 |                 |                  |                  |                  |                  |                  |                  |                  |                  |                  | 4.946<br>(1122) | 5.098<br>(1136)  |

989  
990  
991  
992

**Table S3. Conformational changes for the entire complex (S3A), and conformational transitions (translation and rotation) of Mfd domains from one state to the next. Related to Figures 2-7.**

**Table S3A. Conformational changes for the entire Mfd-EC complexes.**

|            | L2(ADP)         |                  | I(ATP)          |                  | II(ATP)         |                  | III V(ADP)      |                  | IV(ADP)         |                  | V III(ATP)      |                  |
|------------|-----------------|------------------|-----------------|------------------|-----------------|------------------|-----------------|------------------|-----------------|------------------|-----------------|------------------|
|            | align           | rms cur          | align           | rms cur          | align           | rms cur          | align           | rms cur          | align           | rms cur          | align           | rms cur          |
| L1(ATP)    | 0.747<br>(3143) | 35.736<br>(4286) | 0.851<br>(3177) | 42.301<br>(4282) | 1.119<br>(3071) | 44.219<br>(4283) | 1.934<br>(3025) | 46.889<br>(4278) | 1.631<br>(3034) | 44.535<br>(4283) | 1.185<br>(3061) | 44.162<br>(4284) |
| L2(ADP)    |                 |                  | 0.534<br>(3135) | 19.00<br>(4306)  | 1.037<br>(3033) | 22.844<br>(4299) | 1.521<br>(2977) | 24.626<br>(4302) | 1.269<br>(3009) | 23.003<br>(4309) | 0.879<br>(3066) | 24.152<br>(4306) |
| I(ATP)     |                 |                  |                 |                  | 0.967<br>(3034) | 6.839<br>(4303)  | 1.450<br>(2957) | 10.137<br>(4302) | 1.067<br>(2937) | 9.960<br>(4307)  | 0.788<br>(3033) | 11.428<br>(4308) |
| II(ATP)    |                 |                  |                 |                  |                 |                  | 2.127<br>(3247) | 5.428<br>(4303)  | 0.458<br>(2928) | 4.699<br>(4302)  | 0.793<br>(2926) | 7.738<br>(4301)  |
| III_V(ADP) |                 |                  |                 |                  |                 |                  |                 |                  | 2.765<br>(4186) | 3.736<br>(4303)  | 2.905<br>(3540) | 6.433<br>(4302)  |
| IV(ADP)    |                 |                  |                 |                  |                 |                  |                 |                  |                 |                  | 0.633<br>(3071) | 4.491<br>(4307)  |

993

**Table S3B. Conformational transitions (translation of center-of-gravity and rotation) for Mfd domains.**

| Mfd structural domains | Structural transition |              |                     |              |                     |              |
|------------------------|-----------------------|--------------|---------------------|--------------|---------------------|--------------|
|                        | L(0) -> L1(ATP)       |              | L1(ATP) -> L2(ADP)  |              | L2(ADP) -> I(ATP)   |              |
|                        | cog translation (Å)   | rotation (°) | cog translation (Å) | rotation (°) | cog translation (Å) | rotation (°) |
| D1-D3                  | 7.7                   | 28.7         | 59.6                | 162.0        | 44.5                | 102.0        |
| D4(RID)                | 0.37                  | 2.8          | 3.9                 | 11.0         | 0.7                 | 1.6          |
| D5(TD1)                | 10.9                  | 42.5         | 64.5                | 259.1        | 2.8                 | 16.6         |
| D6(TD2)                | 15.9                  | 36.6         | 61.0                | 256.7        | 2.7                 | 10.0         |
| D7                     | 4.3                   | 24.4         | 81.8                | 147.7        | 6.8                 | 14.0         |
| Mfd overall            | cog translation (Å)   | rotation (°) |                     |              |                     |              |
| I(ATP) -> II(ATP)      | 9.8                   | 15.5         |                     |              |                     |              |
| II(ATP) -> III(ADP)    | 7.9                   | 14.8         |                     |              |                     |              |
| III(ADP) -> IV(ADP)    | 8.3                   | 1.9          |                     |              |                     |              |
| IV(ADP) -> V(ATP)      | 5.1                   | 10.4         |                     |              |                     |              |
| V(ATP) -> I(ATP)       | 12.6                  | 30.9         |                     |              |                     |              |

994

**A**

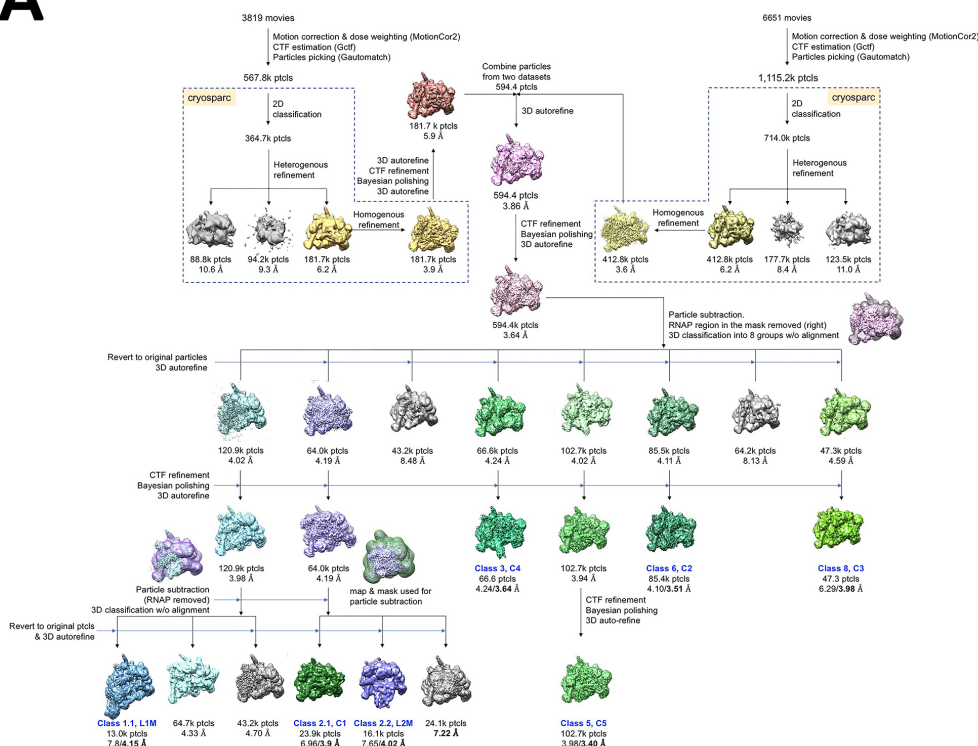

**B**

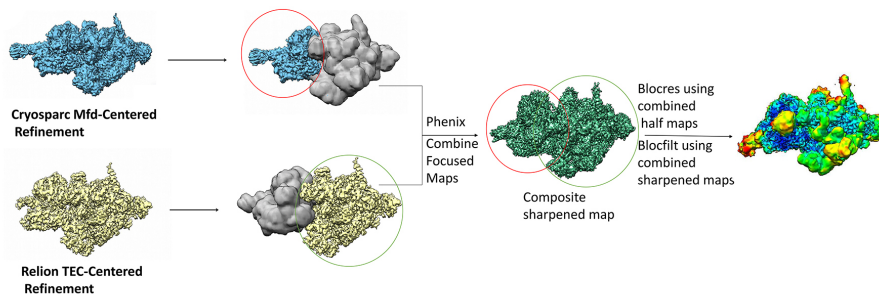

## Kang et al., Figure S1

995

996 **Figure S1. Cryo-EM processing pipeline for Mfd-EC complexes. Related to**

997 **Figure 2.**

998 **A. Cryo-EM processing pipeline for Mfd-EC complexes.**

999 **B. EC-centered and Mfd-centered maps were combined using the PHENIX**

1000 **combine\_focused maps command (Adams et al., 2010).**



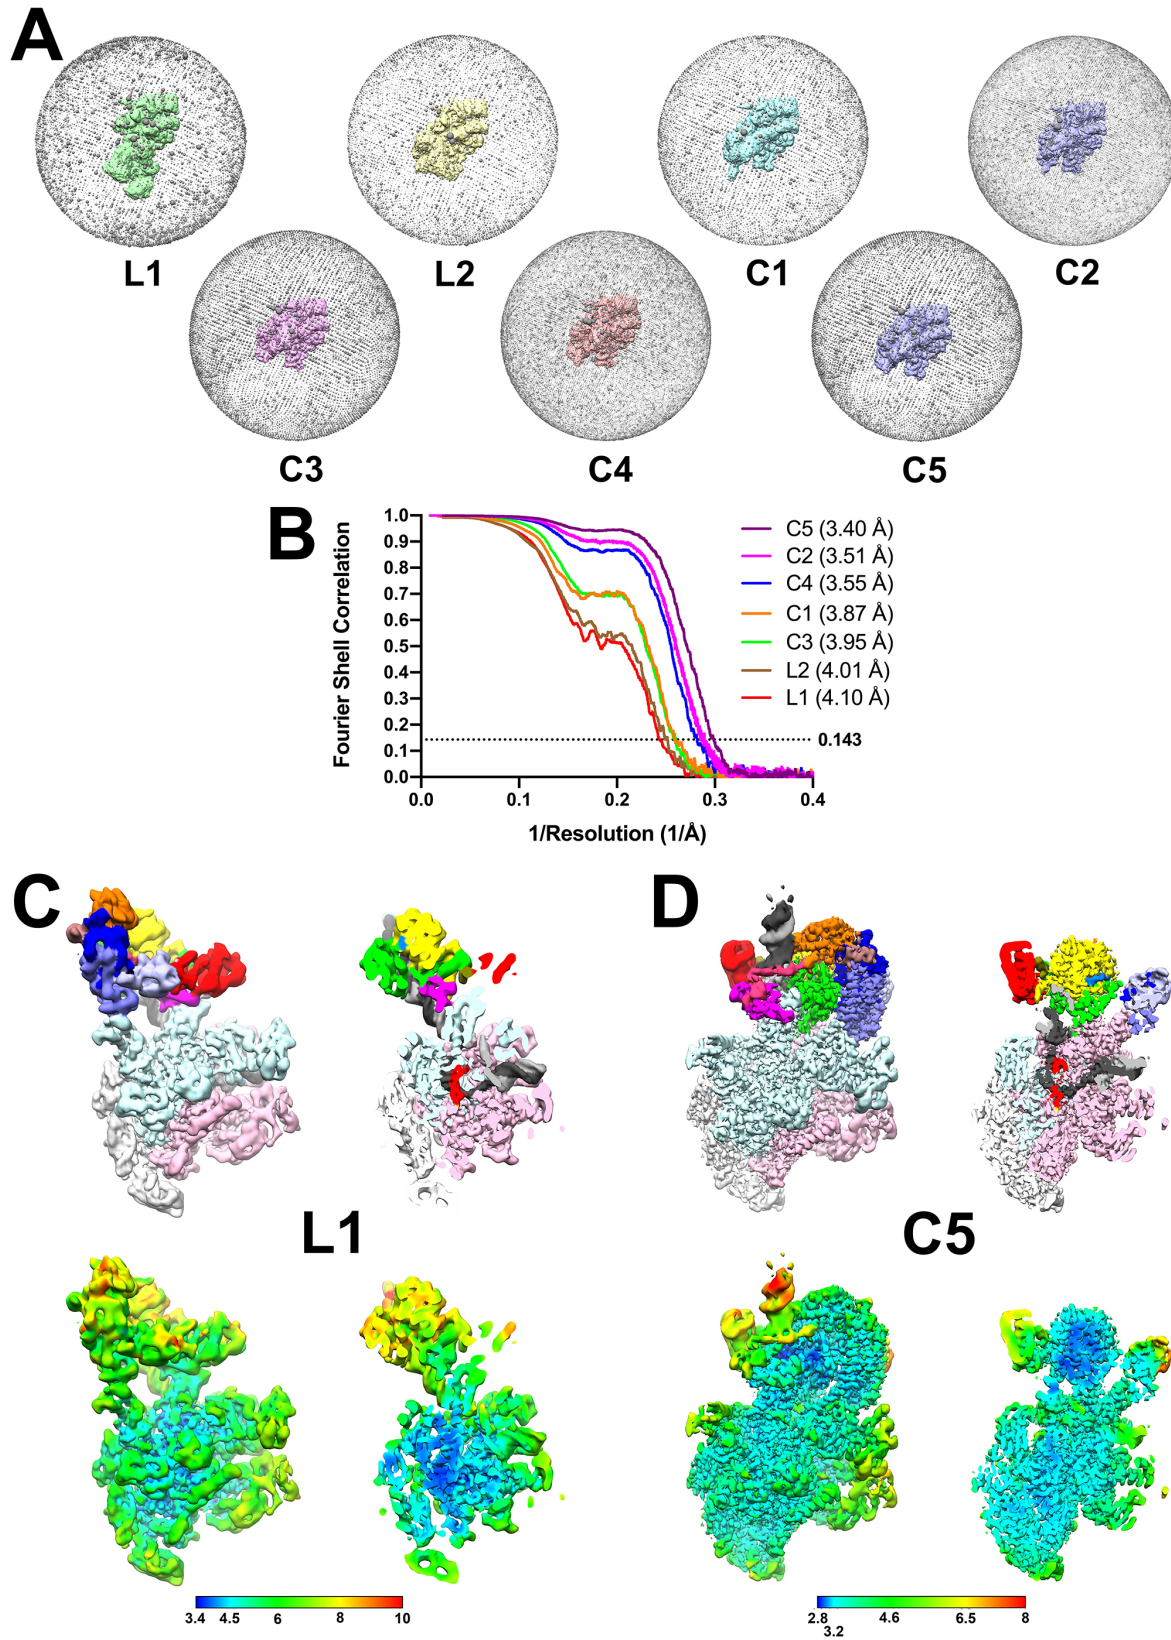

Kang et al, Figure S2

1002 **Figure S2. Cryo-EM of Mfd-EC complexes. Related to Figure 2.**

1003 A. Angular distribution of particle projections for each structural class.

1004 B. Gold-standard FSC for the EC-centered/Mfd-centered composite maps, calculated by  
1005 comparing the two independently determined half-maps using the MTRIAGE module  
1006 (Afonine et al., 2018) of PHENIX (Adams et al., 2010). The dotted line represents the  
1007 0.143 FSC cutoff.

1008 C-D. (*top*) Views of the cryo-EM density map, colored according to the key of Figure 2.

1009 The right view is a cross-section through the center of the left view.

1010 (*bottom*) Same views as on top but colored by local resolution (Cardone et al., 2013).

1011 C. L1, the lowest resolution structural class.

1012 D. C5, the highest resolution structural class.

1013

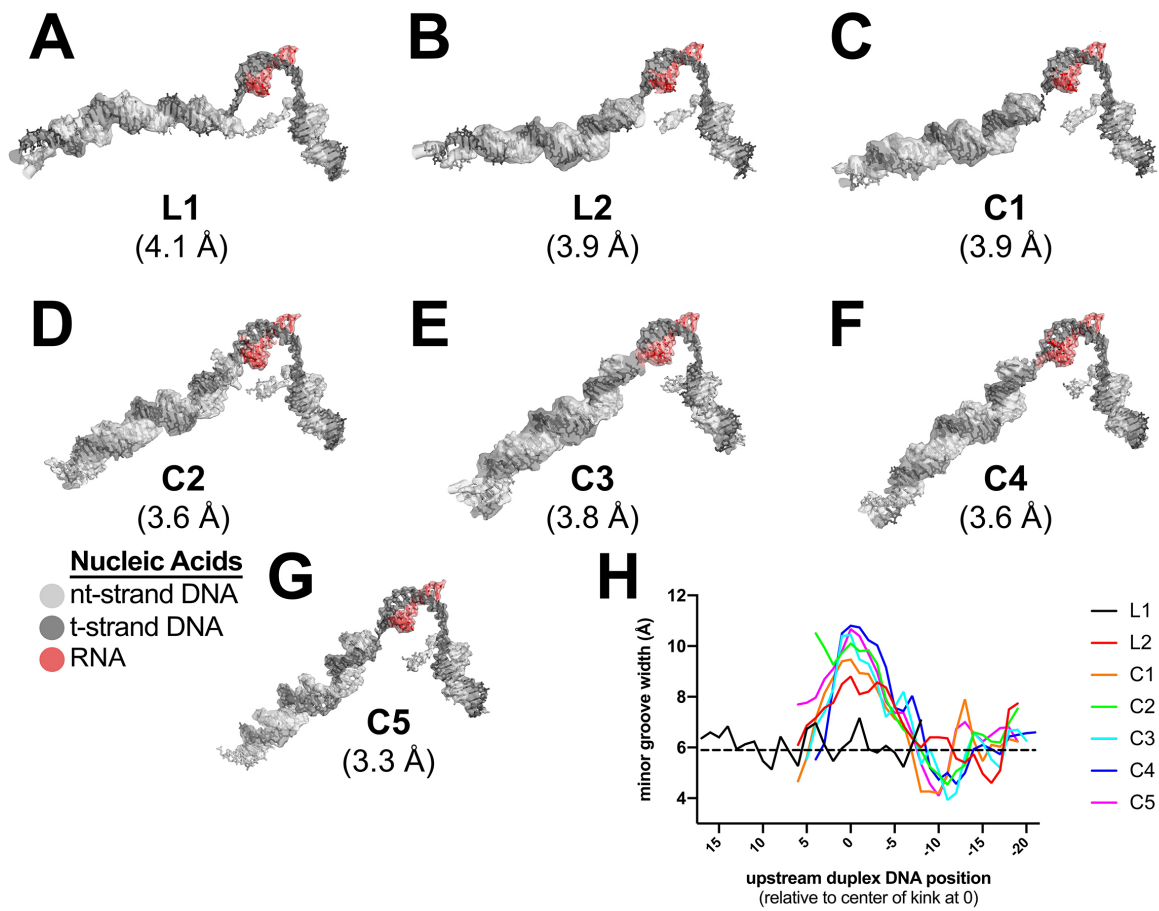

Kang et al., Figure S3

1014  
1015

1016 **Figure S3. Examples of cryo-EM density and Mfd-induced DNA kink.**

1017 A.-G. Cryo-EM density maps, filtered according to the local resolution (Cardone et al.,  
1018 2013), corresponding to the nucleic acids, are shown as transparent surfaces with the  
1019 final refined models superimposed. The color-coding is shown in the key.

1020 A. L1.

1021 B. L2.

1022 C. C1.

1023 D. C2.

1024 E. C3.

1025 F. C4.

1026 G. C5.

1027 H. Plot showing the minor groove width [calculated using Curves+ (Lavery et al., 2009)]  
1028 of the upstream duplex DNA, aligned by the center of the kink (defined as position '0').

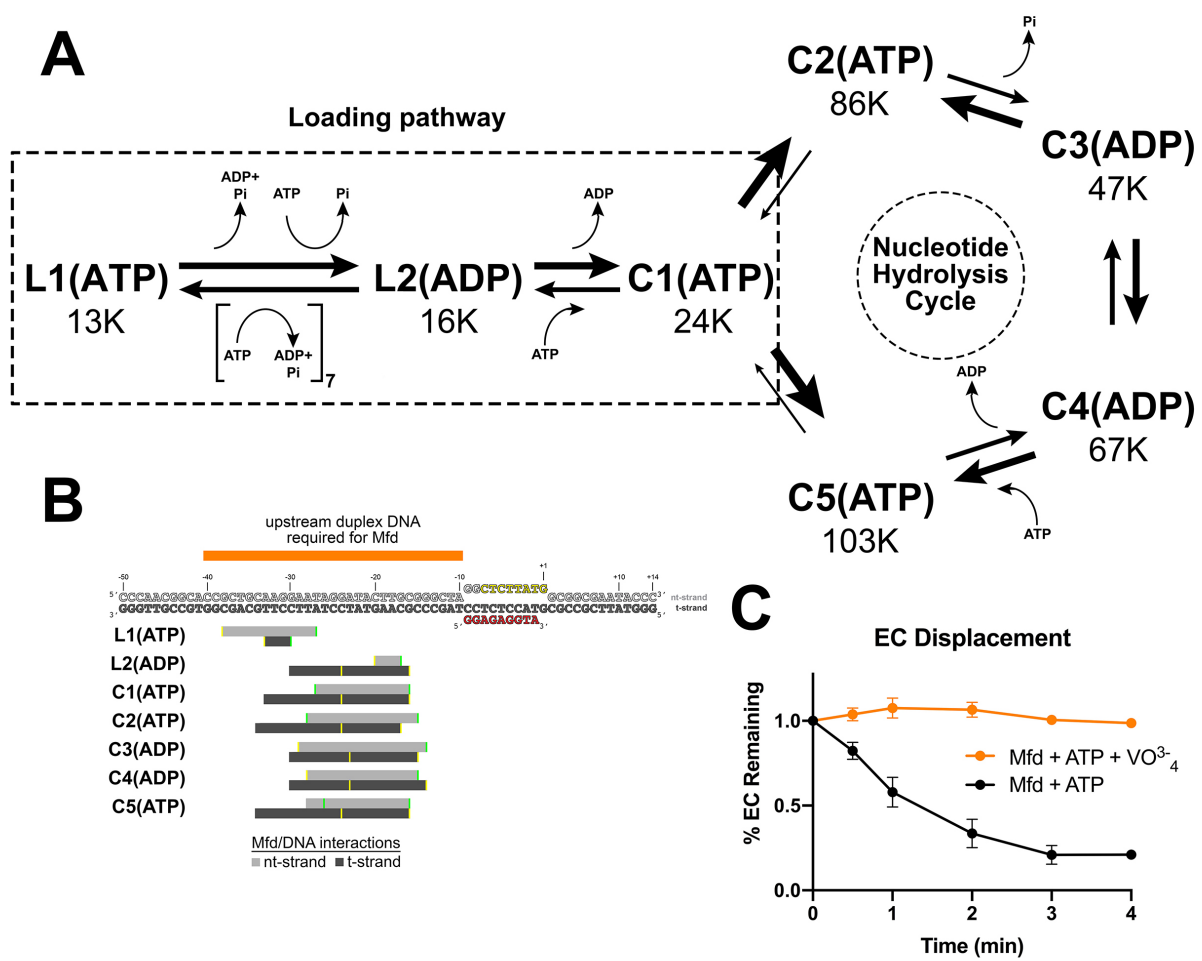

Kang et al., Figure S4

1029  
1030

1031 **Figure S4. Putative structural pathway for Mfd activity, Mfd/DNA interactions, and**  
1032 **inhibition of EC displacement by VO<sup>3-</sup><sub>4</sub>.**

1033 A. Putative ordered pathway of seven Mfd-EC structures (Figures 2B-H). Each structure  
1034 is shown in its position along with the number of particles that gave rise to that  
1035 structural class (Figure S1). All the structures came from identically prepared samples  
1036 so the particle numbers likely represent the stability of each complex. L1(ATP) was  
1037 placed first in the pathway because the Mfd component [Mfd(ATP)]<sub>L1</sub> most closely  
1038 superimposes with apo-Mfd (Table S2B). The structures can be grouped into two main  
1039 groups, L1(ATP) and L2(ADP), which don't superimpose well with any of the other  
1040 structures, and C1(ATP), C2(ATP), C3(ADP), C4(ADP), and C5(ATP), which are all  
1041 relatively similar to each other (Tables S2B, S3A). We thus place L1(ATP) and L2(ADP)  
1042 in a loading pathway, while C1-C5 represent the fully EC-engaged nucleotide hydrolysis  
1043 cycle (NHC) for Mfd. As described in the text, the complete loading pathway requires a  
1044 minimum of ten ATP hydrolysis events, while each cycle of the NHC requires one ATP  
1045 hydrolysis.

1046 B. (*top*) The nucleic acid scaffold is shown (same as Figure 1A except the upstream  
1047 single-stranded RNA is not shown for clarity). Above the sequences, the orange bar  
1048 denotes the extent of upstream duplex DNA required for Mfd function (Park et al.,  
1049 2002). The gray bars below denote the extent of Mfd/DNA interactions in the seven Mfd-  
1050 EC structures (light gray bar, nt-strand interacts; dark gray bar, t-strand). The  
1051 interactions of Mfd(ATP)<sub>L1</sub> with the DNA explain the requirement for ~40 base pairs of  
1052 upstream duplex DNA (Park and Roberts, 2006) and indicate that L1(ATP) is an obligate  
1053 intermediate in the pathway.

1054 C. Displacement of stalled *Eco* ECs from end-labeled DNA fragments by Mfd was  
1055 monitored by EMSA and quantified using a phosphorimager and Imagequant software  
1056 (Chambers, 2003). Data shown are the average of three independent experiments and  
1057 are expressed as a percentage of the amount of EC present prior to the addition of Mfd.  
1058 Error bars indicate standard deviation.

1059

1060

1061 **SUPPLEMENTAL VIDEO TITLES AND LEGENDS**

1062 **Video S1. Mfd translocation. Related to Figure 3.**

1063 The video illustrates the Mfd translocation module inchworm translocation model. The  
1064 Mfd translocation module [D5(TD1), yellow; D6(TD2), green] transitions between the  
1065 closed ATP-bound state and the open ADP-bound state as it translocates on duplex  
1066 DNA. In the first section of the video, the Mfd translocation module inchworms on  
1067 stationary DNA. The second section of the video simulates the effect of blocking the  
1068 forward (left-to-right) motion of the protein but with continued ATP hydrolysis - the  
1069 protein continues to translocate with respect to the DNA, but since the protein can't  
1070 move, the DNA moves (from right-to-left) instead. A reference base pair in the DNA is  
1071 colored magenta.

1072

1073 **Video S2. The Mfd nucleotide hydrolysis cycle. Related to Figure 6.**

1074 The video starts with two orthogonal views of C1 (color-coded as in Figure 6, with the  
1075 RNAP  $\beta$ lobe-Si1 colored in teal, and the RNAP clamp colored in purple, and each  
1076 domain highlighted with a transparent molecular surface). The video cycles through the  
1077 five structures of the Mfd NHC (C1 -> C2 -> C3 -> C4 -> C5). The current structure is  
1078 highlighted in red (lower left). At C2 -> C3 the motions of Mfd open the RNAP clamp,  
1079 and at C4 -> C5 the motions of Mfd twist the  $\beta$ lobe-Si1. After two cycles, two more  
1080 cycles are shown but Mfd and the nucleic acids are removed to further highlight the  
1081 motions of RNAP.

1082



1083 **REFERENCES**

1084

1085 Adams, P.D., Afonine, P.V., Bunkóczi, G., Chen, V.B., Davis, I.W., Echols, N., Headd,  
1086 J.J., Hung, L.-W., Kapral, G.J., Grosse-Kunstleve, R.W., et al. (2010). PHENIX: a  
1087 comprehensive Python-based system for macromolecular structure solution. *Acta*  
1088 *Crystallographica Section D Biological Crystallography* 66, 213–221.

1089 Afonine, P.V., Klaholz, B.P., Moriarty, N.W., Poon, B.K., Sobolev, O.V., Terwilliger, T.C.,  
1090 Adams, P.D., and Urzhumtsev, A. (2018). New tools for the analysis and validation of  
1091 cryo-EM maps and atomic models. *Acta Crystallographica. Section D, Structural Biology*  
1092 74, 814–840.

1093 Bai, X., Rajendra, E., Yang, G., Shi, Y., and Scheres, S.H.W. (2015). Sampling the  
1094 conformational space of the catalytic subunit of human  $\gamma$ -secretase. *ELife* 4, e11182.

1095 Bockrath, R., Barlow, A., and Engstrom, J. (1987). Mutation frequency decline in  
1096 *Escherichia coli* B/r after mutagenesis with ethyl methanesulfonate. *Mutation Research*  
1097 183, 241–247.

1098 Bohr, V.A., Smith, C.A., Okumoto, D.S., and Hanawalt, P.C. (1985). DNA repair in an  
1099 active gene: removal of pyrimidine dimers from the DHFR gene of CHO cells is much  
1100 more efficient than in the genome overall. *Cell* 40, 359–369.

1101 Brueckner, F., Hennecke, U., Carell, T., and Cramer, P. (2007). CPD Damage  
1102 Recognition by Transcribing RNA Polymerase II. *Science* 315, 859–862.

- 1103 Cardone, G., Heymann, J.B., and Steven, A.C. (2013). One number does not fit all:  
1104 mapping local variations in resolution in cryo-EM reconstructions. *Journal of Structural*  
1105 *Biology* 184, 226–236.
- 1106 Chambers, A.L. (2003). A DNA translocation motif in the bacterial transcription-repair  
1107 coupling factor, Mfd. *Nucleic Acids Research* 31, 6409–6418.
- 1108 Chen, J., Gopalkrishnan, S., Chiu, C., Chen, A.Y., Campbell, E.A., Gourse, R.L., Ross,  
1109 W., and Darst, S.A. (2019a). *E. coli* TraR allosterically regulates transcription initiation  
1110 by altering RNA polymerase conformation. *ELife* 8.
- 1111 Chen, J., Noble, A.J., Kang, J.Y., and Darst, S.A. (2019b). Eliminating effects of particle  
1112 adsorption to the air/water interface in single-particle cryo-electron microscopy\_  
1113 Bacterial RNA polymerase and CHAPSO. *Journal of Structural Biology: X* 1, 100005.
- 1114 Chen, J., Chiu, C., Gopalkrishnan, S., Chen, A.Y., Olinares, P.D.B., Saecker, R.M.,  
1115 Winkelman, J.T., Maloney, M.F., Chait, B.T., Ross, W., et al. (2020). Stepwise Promoter  
1116 Melting by Bacterial RNA Polymerase. *Mol Cell*.
- 1117 Chen, V.B., Arendall, W.B., Headd, J.J., Keedy, D.A., Immormino, R.M., Kapral, G.J.,  
1118 Murray, L.W., Richardson, J.S., and Richardson, D.C. (2010). MolProbity: all-atom  
1119 structure validation for macromolecular crystallography. *Acta Crystallographica Section*  
1120 *D Biological Crystallography* 66, 12–21.
- 1121 Davies, D.R., and Hol, W.G.J. (2004). The power of vanadate in crystallographic  
1122 investigations of phosphoryl transfer enzymes. *FEBS Letters* 577, 315–321.

- 1123 Deaconescu, A.M., and Darst, S.A. (2005). Crystallization and preliminary structure  
1124 determination of Escherichia coli Mfd, the transcription-repair coupling factor. *Acta*  
1125 *Crystallographica Section F Structural Biology and Crystallization Communications* 61,  
1126 1062–1064.
- 1127 Deaconescu, A.M., Chambers, A.L., Smith, A.J., Nickels, B.E., Hochschild, A., Savery,  
1128 N.J., and Darst, S.A. (2006). Structural Basis for Bacterial Transcription-Coupled DNA  
1129 Repair. *Cell* 124, 507–520.
- 1130 Deaconescu, A.M., Sevostyanova, A., Artsimovitch, I., and Grigorieff, N. (2012).  
1131 Nucleotide excision repair (NER) machinery recruitment by the transcription-repair  
1132 coupling factor involves unmasking of a conserved intramolecular interface. *P Natl Acad*  
1133 *Sci Usa* 109, 3353–3358.
- 1134 Dillingham, M.S., Wigley, D.B., and Webb, M.R. (2000). Demonstration of Unidirectional  
1135 Single-Stranded DNA Translocation by PcrA Helicase: Measurement of Step Size and  
1136 Translocation Speed †. *Biochemistry-U S A* 39, 205–212.
- 1137 Fan, J., Leroux-Coyau, M., Savery, N.J., and Strick, T.R. (2016). Reconstruction of  
1138 bacterial transcription-coupled repair at single-molecule resolution. *Nature* 536, 234–  
1139 237.
- 1140 Gorbalenya, A.E., and Koonin, E.V. (1993). Helicases: amino acid sequence  
1141 comparisons and structure-function relationships. *Curr Opin Struc Biol* 3, 419–429.

- 1142 GORBALENYA, A.E., Koonin, E.V., DONCHENKO, A.P., and BLINOV, V.M. (1989). 2  
1143 Related Superfamilies of Putative Helicases Involved in Replication, Recombination,  
1144 Repair and Expression of Dna and Rna Genomes. *Nucleic Acids Research* 17, 4713–  
1145 4730.
- 1146 Graves, E.T., Duboc, C., Fan, J., Stransky, F., Leroux-Coyau, M., and Strick, T.R.  
1147 (2015). A dynamic DNA-repair complex observed by correlative single-molecule  
1148 nanomanipulation and fluorescence. *Nature Structural & Molecular Biology* 22, 452–  
1149 457.
- 1150 Haines, N.M., Kim, Y.-I.T., Smith, A.J., and Savery, N.J. (2014). Stalled transcription  
1151 complexes promote DNA repair at a distance. *Proceedings of the National Academy of*  
1152 *Sciences of the United States of America* 111, 4037–4042.
- 1153 Hanawalt, P.C., and Spivak, G. (2008). Transcription-coupled DNA repair: two decades  
1154 of progress and surprises. *Nature Reviews. Molecular Cell Biology* 9, 958–970.
- 1155 Howan, K., Smith, A.J., Westblade, L.F., Joly, N., Grange, W., Zorman, S., Darst, S.A.,  
1156 Savery, N.J., and Strick, T.R. (2012). Initiation of transcription-coupled repair  
1157 characterized at single-molecule resolution. *Nature* 490, 431–434.
- 1158 Kang, J.Y., Olinares, P.D.B., Chen, J., Campbell, E.A., Mustaev, A., Chait, B.T.,  
1159 Gottesman, M.E., and Darst, S.A. (2017). Structural basis of transcription arrest by  
1160 coliphage HK022 nun in an *Escherichia coli* RNA polymerase elongation complex. *ELife*  
1161 6, e25478.

- 1162 Kang, J.Y., Mishanina, T.V., Landick, R., and Darst, S.A. (2019). Mechanisms of  
1163 Transcriptional Pausing in Bacteria. *Journal of Molecular Biology* 431, 4007–4029.
- 1164 Kireeva, M.L., Komissarova, N., Waugh, D.S., and Kashlev, M. (2000). The 8-  
1165 Nucleotide-long RNA:DNA Hybrid Is a Primary Stability Determinant of the RNA  
1166 Polymerase II Elongation Complex. *J Biol Chem* 275, 6530–6536.
- 1167 Komissarova, N., and Kashlev, M. (1997a). RNA polymerase switches between  
1168 inactivated and activated states By translocating back and forth along the DNA and the  
1169 RNA. *Journal of Biological Chemistry* 272, 15329–15338.
- 1170 Komissarova, N., and Kashlev, M. (1997b). Transcriptional arrest: Escherichia coli RNA  
1171 polymerase translocates backward, leaving the 3' end of the RNA intact and extruded.  
1172 *Proceedings of the National Academy of Sciences of the United States of America* 94,  
1173 1755–1760.
- 1174 Komissarova, N., Kireeva, M.L., Becker, J., Sidorenkov, I., and Kashlev, M. (2003).  
1175 Engineering of elongation complexes of bacterial and yeast RNA polymerases. *Methods*  
1176 *in Enzymology* 371, 233–251.
- 1177 Kunala, S., and Brash, D.E. (1992). Excision repair at individual bases of the  
1178 Escherichia coli lacI gene: relation to mutation hot spots and transcription coupling  
1179 activity. *Proceedings of the National Academy of Sciences of the United States of*  
1180 *America* 89, 11031–11035.

- 1181 Landick, R. (2006). The regulatory roles and mechanism of transcriptional pausing.  
1182 *Biochemical Society Transactions* 34, 1062–1066.
- 1183 Lavery, R., Moakher, M., Maddocks, J.H., Petkeviciute, D., and Zakrzewska, K. (2009).  
1184 Conformational analysis of nucleic acids revisited: Curves+. *Nucleic Acids Res* 37,  
1185 5917–5929.
- 1186 Le, T.T., Yang, Y., Tan, C., Suhanovsky, M.M., Fulbright, R.M., Inman, J.T., Li, M., Lee,  
1187 J., Perelman, S., Roberts, J., et al. (2018). Mfd Dynamically Regulates Transcription via  
1188 a Release and Catch-Up Mechanism. *Cell* 172, 344-357.e15.
- 1189 Levin, J.R., Krummel, B., and Chamberlin, M.J. (1987). Isolation and properties of  
1190 transcribing ternary complexes of *Escherichia coli* RNA polymerase positioned at a  
1191 single template base. *Journal of Molecular Biology* 196, 85–100.
- 1192 Lohman, T.M., Tomko, E.J., and Wu, C.G. (2008). Non-hexameric DNA helicases and  
1193 translocases: mechanisms and regulation. *Nat Rev Mol Cell Bio* 9, 391–401.
- 1194 Mahdi, A.A., Briggs, G.S., Sharples, G.J., Wen, Q., and Lloyd, R.G. (2003). A model for  
1195 dsDNA translocation revealed by a structural motif common to RecG and Mfd proteins.  
1196 *The EMBO Journal* 22, 724–734.
- 1197 Manelyte, L., Kim, Y.-I.T., Smith, A.J., Smith, R.M., and Savery, N.J. (2010). Regulation  
1198 and rate enhancement during transcription-coupled DNA repair. *Molecular Cell* 40, 714–  
1199 724.

- 1200 Marty, M.T., Baldwin, A.J., Marklund, E.G., Hochberg, G.K.A., Benesch, J.L.P., and  
1201 Robinson, C.V. (2015). Bayesian deconvolution of mass and ion mobility spectra: from  
1202 binary interactions to polydisperse ensembles. *Analytical Chemistry* 87, 4370–4376.
- 1203 MELLON, I., and Hanawalt, P.C. (1989). Induction of the Escherichia-Coli Lactose  
1204 Operon Selectively Increases Repair of Its Transcribed Dna Strand. *Nature* 342, 95–98.
- 1205 MELLON, I., Spivak, G., and Hanawalt, P.C. (1987). Selective removal of transcription-  
1206 blocking DNA damage from the transcribed strand of the mammalian DHFR gene. *Cell*  
1207 51, 241–249.
- 1208 Morin, A., Eisenbraun, B., Key, J., Sanschagrín, P.C., Timony, M.A., Ottaviano, M., and  
1209 Sliz, P. (2013). Collaboration gets the most out of software. *ELife* 2, e01456.
- 1210 Murphy, M.N., Gong, P., Ralto, K., Manelyte, L., Savery, N.J., and Theis, K. (2009). An  
1211 N-terminal clamp restrains the motor domains of the bacterial transcription-repair  
1212 coupling factor Mfd. *Nucleic Acids Research* 37, 6042–6053.
- 1213 Nudler, E., Avetisova, E., Markovtsov, V., and Goldfarb, A. (1996). Transcription  
1214 processivity: protein-DNA interactions holding together the elongation complex. *Science*  
1215 273, 211–217.
- 1216 Nudler, E., Mustaev, A., Lukhtanov, E., and Goldfarb, A. (1997). The RNA-DNA hybrid  
1217 maintains the register of transcription by preventing backtracking of RNA polymerase.  
1218 *Cell* 89, 33–41.

- 1219 Oldham, M.L., and Chen, J. (2011). Snapshots of the maltose transporter during ATP  
1220 hydrolysis. *Proceedings of the National Academy of Sciences of the United States of*  
1221 *America* *108*, 15152–15156.
- 1222 Olinares, P.D.B., and Chait, B.T. (2019). *Methods in Molecular Biology*. *Methods Mol*  
1223 *Biology Clifton N J* *2062*, 357–382.
- 1224 Olinares, P.D.B., Dunn, A.D., Padovan, J.C., Fernandez-Martinez, J., Rout, M.P., and  
1225 Chait, B.T. (2016). A Robust Workflow for Native Mass Spectrometric Analysis of  
1226 Affinity-Isolated Endogenous Protein Assemblies. *Analytical Chemistry* *88*, 2799–2807.
- 1227 Oller, A.R., Fijalkowska, I.J., Dunn, R.L., and Schaaper, R.M. (1992). Transcription-  
1228 repair coupling determines the strandedness of ultraviolet mutagenesis in *Escherichia*  
1229 *coli*. *Proceedings of the National Academy of Sciences of the United States of America*  
1230 *89*, 11036–11040.
- 1231 Pakotiprapha, D., Liu, Y., Verdine, G.L., and Jeruzalmi, D. (2009). A structural model for  
1232 the damage-sensing complex in bacterial nucleotide excision repair. *Journal of*  
1233 *Biological Chemistry* *284*, 12837–12844.
- 1234 Pakotiprapha, D., Samuels, M., Shen, K., Hu, J.H., and Jeruzalmi, D. (2012). Structure  
1235 and mechanism of the UvrA-UvrB DNA damage sensor. *Nat Struct Mol Biol* *19*, 291–  
1236 298.



- 1237 Park, J.-S., and Roberts, J. (2006). Role of DNA bubble rewinding in enzymatic  
1238 transcription termination. *Proceedings of the National Academy of Sciences of the*  
1239 *United States of America* *103*, 4870–4875.
- 1240 Park, J.-S., Marr, M.T., and Roberts, J. (2002). *E. coli* Transcription repair coupling  
1241 factor (Mfd protein) rescues arrested complexes by promoting forward translocation.  
1242 *Cell* *109*, 757–767.
- 1243 Pettersen, E.F., Goddard, T.D., Huang, C.C., Couch, G.S., Greenblatt, D.M., Meng,  
1244 E.C., and Ferrin, T.E. (2004). UCSF Chimera—a visualization system for exploratory  
1245 research and analysis. *Journal of Computational Chemistry* *25*, 1605–1612.
- 1246 Proshkin, S.A., and Mironov, A.S. (2016). Stalled RNA Polymerase Is a Target of the  
1247 Mfd Factor. *Molecular Biology* *50*, 332–335.
- 1248 Punjani, A., Zhang, H., and Fleet, D.J. (2019). Non-uniform refinement: Adaptive  
1249 regularization improves single particle cryo-EM reconstruction. *Biorxiv*  
1250 2019.12.15.877092.
- 1251 Reid, D.J., Diesing, J.M., Miller, M.A., Perry, S.M., Wales, J.A., Montfort, W.R., and  
1252 Marty, M.T. (2019). High-Throughput Deconvolution of Native Mass Spectra. *J Am Soc*  
1253 *Mass Spectrom* *30*, 118–127.
- 1254 Roberts, J., and Park, J.-S. (2004). Mfd, the bacterial transcription repair coupling  
1255 factor: translocation, repair and termination. *Current Opinion in Microbiology* *7*, 120–  
1256 125.

- 1257 Scheres, S.H.W. (2012). RELION: implementation of a Bayesian approach to cryo-EM  
1258 structure determination. *Journal of Structural Biology* 180, 519–530.
- 1259 Selby, C.P. (2017). Mfd Protein and Transcription-Repair Coupling in *Escherichia coli*.  
1260 *Photochemistry and Photobiology* 93, 280–295.
- 1261 Selby, C.P., and Sancar, A. (1990). Transcription preferentially inhibits nucleotide  
1262 excision repair of the template DNA strand in vitro. *Journal of Biological Chemistry* 265,  
1263 21330–21336.
- 1264 Selby, C.P., and Sancar, A. (1991). Gene- and strand-specific repair in vitro: partial  
1265 purification of a transcription-repair coupling factor. *Proceedings of the National*  
1266 *Academy of Sciences of the United States of America* 88, 8232–8236.
- 1267 Selby, C.P., and Sancar, A. (1993). Molecular mechanism of transcription-repair  
1268 coupling. *Science* 260, 53–58.
- 1269 Selby, C.P., and Sancar, A. (1994). Mechanisms of transcription-repair coupling and  
1270 mutation frequency decline. *Microbiological Reviews* 58, 317–329.
- 1271 Selby, C.P., and Sancar, A. (1995a). Structure and Function of Transcription-Repair  
1272 Coupling Factor .2. Catalytic Properties. *Journal of Biological Chemistry* 270, 4890–  
1273 4895.
- 1274 Selby, C.P., and Sancar, A. (1995b). Structure and function of transcription-repair  
1275 coupling factor. I. Structural domains and binding properties. *The Journal of Biological*  
1276 *Chemistry* 270, 4882–4889.

- 1277 Selby, C.P., Witkin, E.M., and Sancar, A. (1991). *Escherichia coli* mfd mutant deficient  
1278 in “mutation frequency decline” lacks strand-specific repair: in vitro complementation  
1279 with purified coupling factor. *Proceedings of the National Academy of Sciences of the*  
1280 *United States of America* 88, 11574–11578.
- 1281 Shimizu, T., and Johnson, K.A. (1983). *J. Biol. Chem.*-1983-Shimizu-13833-40.pdf. *J*  
1282 *Biological Chem* 258, 13833–13840.
- 1283 Singleton, M.R., Dillingham, M.S., and Wigley, D.B. (2007). Structure and Mechanism of  
1284 Helicases and Nucleic Acid Translocases. *Annu Rev Biochem* 76, 23–50.
- 1285 Smith, A.J., and Savery, N.J. (2005). RNA polymerase mutants defective in the initiation  
1286 of transcription-coupled DNA repair. *Nucleic Acids Research* 33, 755–764.
- 1287 Smith, A.J., Szczelkun, M.D., and Savery, N.J. (2007). Controlling the motor activity of a  
1288 transcription-repair coupling factor: autoinhibition and the role of RNA polymerase.  
1289 *Nucleic Acids Research* 35, 1802–1811.
- 1290 Smith, A.J., Pernstich, C., and Savery, N.J. (2012). Multipartite control of the DNA  
1291 translocase, Mfd. *Nucleic Acids Research* 40, 10408–10416.
- 1292 Srivastava, D.B., and Darst, S.A. (2011). Derepression of bacterial transcription-repair  
1293 coupling factor is associated with a profound conformational change. *Journal of*  
1294 *Molecular Biology* 406, 275–284.

- 1295 Tagami, S., Sekine, S., Kumarevel, T., Hino, N., Murayama, Y., Kamegamori, S.,  
1296 Yamamoto, M., Sakamoto, K., and Yokoyama, S. (2010). Crystal structure of bacterial  
1297 RNA polymerase bound with a transcription inhibitor protein. *Nature* *468*, 978–982.
- 1298 Tomko, E.J., Fischer, C.J., Niedziela-Majka, A., and Lohman, T.M. (2007). A  
1299 Nonuniform Stepping Mechanism for *E. coli* UvrD Monomer Translocation along Single-  
1300 Stranded DNA. *Mol Cell* *26*, 335–347.
- 1301 Troelstra, C., Gool, A. van, Wit, J. de, Vermeulen, W., Bootsma, D., and Hoeijmakers,  
1302 J.H. (1992). ERCC6, a member of a subfamily of putative helicases, is involved in  
1303 Cockayne's syndrome and preferential repair of active genes. *Cell* *71*, 939–953.
- 1304 Velankar, S.S., Soultanas, P., Dillingham, M.S., Subramanya, H.S., and Wigley, D.B.  
1305 (1999). Crystal structures of complexes of PcrA DNA helicase with a DNA substrate  
1306 indicate an inchworm mechanism. *Cell* *97*, 75–84.
- 1307 Walker, J.E., Luyties, O., and Santangelo, T.J. (2017). Factor-dependent archaeal  
1308 transcription termination. *Proceedings of the National Academy of Sciences of the*  
1309 *United States of America* *114*, E6767–E6773.
- 1310 Weixlbaumer, A., Leon, K., Landick, R., and Darst, S.A. (2013). Structural Basis of  
1311 Transcriptional Pausing in Bacteria. *Cell* *152*, 431–441.
- 1312 Westblade, L.F., Campbell, E.A., Pukhrambam, C., Padovan, J.C., Nickels, B.E.,  
1313 Lamour, V., and Darst, S.A. (2010). Structural basis for the bacterial transcription-repair  
1314 coupling factor/RNA polymerase interaction. *Nucleic Acids Research* *38*, 8357–8369.

1315 Witkin, E.M. (1966). Radiation-Induced Mutations and Their Repair. *Science* 152, 1345-  
1316 +.

1317 Xu, J., Lahiri, I., Wang, W., Wier, A., Cianfrocco, M.A., Chong, J., Hare, A.A., Dervan,  
1318 P.B., DiMaio, F., Leschziner, A.E., et al. (2017). Structural basis for the initiation of  
1319 eukaryotic transcription-coupled DNA repair. *Nature* 551, 653–657.

1320 Yarranton, G.T., and Gefter, M.L. (1979). Enzyme-catalyzed DNA unwinding: Studies  
1321 on *Escherichia coli* rep protein. *Proc National Acad Sci* 76, 1658–1662.

1322 Zhang, G., Campbell, E.A., Minakhin, L., Richter, C., Severinov, K., and Darst, S.A.  
1323 (1999). Crystal structure of *Thermus aquaticus* core RNA polymerase at 3.3 Å  
1324 resolution. *Cell* 98, 811–824.

1325
